# Supplementary material
Source: PubMed Central journal article supplement (PMC8216321)
Supplement: Supplementary_Table_1.pdf [file Supplementary_Table_1.pdf]

| Supplementary Table 1: Drugs involved in COVID-19 therapy and their associated genes |             |                       |                                                                                    |                                              |                                       |           |
|--------------------------------------------------------------------------------------|-------------|-----------------------|------------------------------------------------------------------------------------|----------------------------------------------|---------------------------------------|-----------|
| Drug                                                                                 | DrugBank ID | Category              | Target                                                                             | Enzyme                                       | Transporters                          | Carriers  |
| <b>Anti-Cytokine/Anti-Inflammatory</b>                                               |             |                       |                                                                                    |                                              |                                       |           |
| Tocilizumab                                                                          | DB06273     | Interleukin Inhibitor | IL6R                                                                               | CYP3A4                                       |                                       |           |
| Sarilumab                                                                            | DB11767     | Interleukin Inhibitor | IL6R, FCGR1A,                                                                      | CYP3A4                                       |                                       |           |
| Anakinra                                                                             | DB00026     | Interleukin Inhibitor | IL1R1                                                                              |                                              |                                       |           |
| Siltuximab                                                                           | DB09036     | Interleukin Inhibitor | IL6                                                                                | CYP3A4                                       |                                       |           |
| Leflunomide                                                                          | DB01097     | Immunosuppressants    | <b>DHODH, AHR, PTK2B</b>                                                           | <b>CYP2C9, CYP1A2</b>                        | ABCG2                                 |           |
| Clazakizumab                                                                         | DB12849     | Immunoglobulins       |                                                                                    |                                              |                                       |           |
| Prazosin                                                                             | DB00457     | Cardiovascular Agents | <b>ADRA1A, ADRA1B, ADRA1D, KCNH2, ADRA2A, ADRA2B,</b>                              |                                              | <b>SLC22A1, SLC22A3, ABCB1, ABCG2</b> | ORM1      |
| Canakinumab                                                                          | DB06168     | Immunosuppressants    | IL1B                                                                               |                                              |                                       |           |
| Naltrexone                                                                           | DB00704     | Analgesics            | OPRD1, OPRM1, OPRK1, SIGMAR1                                                       | UGT1A1                                       |                                       |           |
| Ketamine                                                                             | DB01221     | Anesthetics           | <b>GRIN3A, TACR1, DRD2, OPRD1, SLC6A2, OPRK1, OPRM1, HTR3A, CHRNA7, BCHE, NOS1</b> | <b>CYP2C9, CYP3A4, CYP2B6, PTGS1, CYP2C8</b> |                                       |           |
| Sirukumab                                                                            | DB11803     | Immunosuppressants    |                                                                                    |                                              |                                       |           |
| Fluoxetine                                                                           | DB00472     | Antidepressants       | SLC6A4,                                                                            | CYP2C19,                                     | ABCB1                                 | ALB, ORM1 |
| Astegolimab                                                                          |             |                       |                                                                                    |                                              |                                       |           |
| Ulinastatin                                                                          | DB12038     | Hemostatics           |                                                                                    |                                              |                                       |           |
| Mavrilimumab                                                                         | DB12534     | Immunoglobulins       |                                                                                    |                                              |                                       |           |
| Axatilimab                                                                           |             |                       |                                                                                    |                                              |                                       |           |

|               |         |                        |                                                 |                                                                                                                                                                                               |                                                                  |     |
|---------------|---------|------------------------|-------------------------------------------------|-----------------------------------------------------------------------------------------------------------------------------------------------------------------------------------------------|------------------------------------------------------------------|-----|
| Lenzilumab    | DB15148 |                        |                                                 |                                                                                                                                                                                               |                                                                  |     |
| Sargramostim  | DB00020 | Immunostimulants       | CSF2RA, IL3RA,                                  |                                                                                                                                                                                               |                                                                  |     |
| Tofacitinib   | DB08895 | Immunosuppressants     | JAK1, JAK2,<br>JAK3, <b>TYK2</b>                | CYP3A4,<br>CYP2C19                                                                                                                                                                            |                                                                  | ALB |
| Leronlimab    | DB05941 | Anti-Retroviral Agents | CCR5                                            |                                                                                                                                                                                               |                                                                  |     |
| Eculizumab    | DB01257 | Immunosuppressants     | C5                                              |                                                                                                                                                                                               |                                                                  |     |
| Dexamethasone | DB01234 | Corticosteroids        | <b>NR3C1, NR0B1,<br/>ANXA1, NOS2,<br/>NR1I2</b> | HSD11B2,<br>CYP3A4,<br>HSD11B1,<br>CYP3A5,<br>CYP3A7,<br>CYP17A1,<br><b>CYP1A1,<br/>CYP2A6,</b><br>CYP2B6,<br>CYP2C19,<br><b>CYP2C8,</b><br>CYP2E1,<br><b>CYP3A43,</b><br>CYP4A11,<br>CYP11B1 | ABCB1,<br>SLC22A8,<br>ABCB11,<br>ABCC2, ABCG2,<br><b>SLCO1A2</b> | ALB |
| Apremilast    | DB05676 | Immunosuppressants     | PDE4                                            | CYP3A4,<br><b>CYP2A6,</b><br>CYP1A2                                                                                                                                                           | ABCB1                                                            |     |
| Cenicriviroc  | DB11758 | Anti-Retroviral Agents |                                                 |                                                                                                                                                                                               |                                                                  |     |
| Icatibant     | DB06196 | Analgesics             | BDKRB2,<br><b>ANPEP</b>                         |                                                                                                                                                                                               |                                                                  |     |
| Razuprotafib  |         |                        |                                                 |                                                                                                                                                                                               |                                                                  |     |
| Naproxen      | DB00788 | Analgesics             | PTGS1, PTGS2                                    | <b>CYP2C9,<br/>CYP1A2,<br/>CYP2C8,<br/>UGT2B7,<br/>UGT1A3,<br/>UGT1A6,<br/>UGT1A7,<br/>UGT1A8,<br/>UGT1A9,<br/>UGT1A10</b>                                                                    | <b>SLCO1A2,<br/>SLC22A6,<br/>ABCB11,<br/>ABCB1,<br/>SLC22A8</b>  | ALB |

|                                 |         |                      |                                                                                                                                                                                      |                                                                                                                                                                                                                                              |                                                                                             |     |
|---------------------------------|---------|----------------------|--------------------------------------------------------------------------------------------------------------------------------------------------------------------------------------|----------------------------------------------------------------------------------------------------------------------------------------------------------------------------------------------------------------------------------------------|---------------------------------------------------------------------------------------------|-----|
| Baricitinib                     | DB11817 | Immunosuppressants   | JAK1, JAK2,<br>PTK2B, JAK3                                                                                                                                                           | CYP3A4                                                                                                                                                                                                                                       | SLC22A8,<br>ABCG2,<br><b>SLC47A2</b> ,<br>SLC22A6,<br>SLC22A2,<br><b>SLCO1B3</b> ,<br>ABCB1 |     |
| Nicotine                        | DB00184 | Nervous system drugs | CHRNA4,<br><b>CHRNA7</b> ,<br>CHRN2,<br>CHRNA2,<br><b>CHRNA3</b> ,<br><b>CHRNA5</b> ,<br>CHRNA6,<br><b>CHRNA9</b> ,<br><b>CHRNA10</b> ,<br><b>CHRN3</b> ,<br>CHRN4,<br>CYP19A1, CHAT | <b>CYP2A6</b> ,<br><b>CYP2E1</b> ,<br><b>CYP2A13</b> ,<br><b>CYP2B6</b> ,<br><b>CYP1A1</b> ,<br><b>CYP1A2</b> ,<br><b>CYP2C19</b> ,<br><b>CYP2C8</b> ,<br><b>CYP2C9</b> ,<br><b>CYP2D6</b> ,<br><b>CYP3A4</b> ,<br><b>MAOA</b> , <b>MAOB</b> | SLC22A2,<br><b>SLC22A1</b> ,<br>SLC22A3,<br><b>SLC22A5</b> ,<br><b>SLC22A4</b>              |     |
| Disulfiram                      | DB00822 | Nervous system drugs | ALDH2, DBH                                                                                                                                                                           | CYP2E1,<br>CYP3A4,<br>CYP3A5                                                                                                                                                                                                                 | ABCB11                                                                                      |     |
| <b>Inhibit viral entry</b>      |         |                      |                                                                                                                                                                                      |                                                                                                                                                                                                                                              |                                                                                             |     |
| Hydroxychloroquine              | DB01611 | Antiprotozoals       | TLR7, TLR9,<br>ACE2                                                                                                                                                                  | CYP3A4,<br><b>CYP2D6</b> ,<br><b>CYP2C8</b>                                                                                                                                                                                                  | ABCB1,<br><b>SLCO1A2</b>                                                                    | ALB |
| Chloroquine                     | DB00608 | Antiprotozoals       | GSTA2, TNF,<br>TLR9, HMGB1,<br>GSTM1, ACE2                                                                                                                                           | <b>CYP2C8</b> ,<br><b>CYP3A4</b> ,<br><b>CYP3A5</b> ,<br><b>CYP2D6</b> ,<br><b>CYP1A1</b>                                                                                                                                                    | ABCB1                                                                                       | ALB |
| Camostat Mesylate<br>(Camostat) | DB13729 | Hemostatics          | PRSS1,<br><b>TMPS2</b> ,<br>ST14, CCK                                                                                                                                                |                                                                                                                                                                                                                                              |                                                                                             |     |

|              |         |                             |                                                                                                                                                        |                                                                                                                                                                                                             |                                                                    |     |
|--------------|---------|-----------------------------|--------------------------------------------------------------------------------------------------------------------------------------------------------|-------------------------------------------------------------------------------------------------------------------------------------------------------------------------------------------------------------|--------------------------------------------------------------------|-----|
| Umifenovir   | DB13609 | Antiviral                   |                                                                                                                                                        | CYP3A4, FMO3, FMO1, CYP2E1, CYP1A2, <b>CYP2D6</b> , <b>CYP2C9</b> , CYP3A5, <b>UGT1A9</b> , UGT2B7                                                                                                          |                                                                    |     |
| DAS181       | DB15313 | Recombinant Proteins        |                                                                                                                                                        |                                                                                                                                                                                                             |                                                                    |     |
| Losartan     | DB00678 | Cardiovascular System drugs | AGTR1                                                                                                                                                  | <b>CYP2C9</b> , <b>CYP3A4</b> , <b>CYP2C19</b> , <b>UGT1A1</b> , <b>UGT1A3</b> , <b>UGT1A10</b> , <b>UGT2B7</b> , <b>UGT2B17</b> , <b>CYP2C8</b>                                                            | ABCB1, SLC22A6, SLC22A12, <b>SLC2A9</b> , ABCB11                   | ALB |
| Isotretinoin | DB00982 | Dermatologicals             | RARA, RARG                                                                                                                                             | CYP3A4                                                                                                                                                                                                      |                                                                    | ALB |
| Telmisartan  | DB00966 | Cardiovascular System drugs | AGTR1, PPARG                                                                                                                                           | CYP2C19, <b>UGT1A3</b>                                                                                                                                                                                      | ABCB1, ABCC2, ABCG2, ABCB11                                        |     |
| Ramipril     | DB00178 | Cardiovascular System drugs | ACE, BDKRB1                                                                                                                                            | BCHE                                                                                                                                                                                                        | SLC15A1, <b>SLC15A2</b>                                            |     |
| Nicotine     | DB00184 | Nervous system drugs        | CHRNA4, <b>CHRNA7</b> , CHRNB2, CHRNA2, <b>CHRNA3</b> , <b>CHRNA5</b> , CHRNA6, <b>CHRNA9</b> , <b>CHRNA10</b> , <b>CHRNB3</b> , CHRNB4, CYP19A1, CHAT | <b>CYP2A6</b> , <b>CYP2E1</b> , <b>CYP2A13</b> , <b>CYP2B6</b> , <b>CYP1A1</b> , <b>CYP1A2</b> , <b>CYP2C19</b> , <b>CYP2C8</b> , <b>CYP2C9</b> , <b>CYP2D6</b> , <b>CYP3A4</b> , <b>MAOA</b> , <b>MAOB</b> | SLC22A2, <b>SLC22A1</b> , SLC22A3, <b>SLC22A5</b> , <b>SLC22A4</b> |     |

**Inhibit viral replication**

|                                 |         |                                                |                           |                                                                                                                      |                                                                                                                             |           |
|---------------------------------|---------|------------------------------------------------|---------------------------|----------------------------------------------------------------------------------------------------------------------|-----------------------------------------------------------------------------------------------------------------------------|-----------|
| Remdesivir                      | DB14761 | Antiviral Agents                               | rep (Organism: SARS-CoV2) | <b>CYP2C8,</b><br><b>CYP2D6,</b><br><b>CYP3A4</b>                                                                    | <b>SLCO1B1,</b><br><b>ABCB1,</b><br><b>SLCO1B3,</b><br><b>ABCB11,</b><br><b>ABCC4,</b><br><b>SLC10A1</b>                    |           |
| Favipiravir                     | DB12466 | Antiviral Agents                               |                           | AOX1, XDH,<br><b>CYP2C8,</b><br>CYP2E1                                                                               | ABCB1,<br>SLC22A6,<br>SLC22A8,<br>SLC22A12                                                                                  | ALB       |
| Ribavirin                       | DB00811 | Antiviral Agents                               | IMPDH1,<br>IMPDH2         | ADK, NT5C2                                                                                                           | SLC29A1,<br>SLC28A3                                                                                                         |           |
| Darunavir                       | DB01264 | Antiviral Agents                               |                           | <b>CYP3A4,</b><br><b>CYP2D6</b>                                                                                      | <b>SLCO1B1,</b><br><b>ABCB1</b>                                                                                             | ALB, ORM1 |
| Clevudine                       | DB06683 | Antiviral Agents                               |                           |                                                                                                                      |                                                                                                                             |           |
| Lopinavir                       | DB01601 | Antiviral Agents                               |                           | CYP3A4,<br><b>CYP2D6,</b><br>CYP1A2,<br>CYP2C19,<br>CYP2B6,<br><b>CYP2C9</b>                                         | ABCB1,<br><b>SLCO1B1,</b><br><b>SLCO1B3,</b><br>ABCB11                                                                      | ORM1, ALB |
| Ritonavir                       | DB00503 | Antiviral Agents                               | NR1I2                     | CYP3A4,<br><b>CYP2D6,</b><br><b>CYP2C9,</b><br>CYP2C19,<br>CYP2B6,<br><b>CYP2C8,</b><br>CYP1A2,<br>CYP3A5,<br>CYP3A7 | ABCB1, <b>ABCC1,</b><br><b>SLCO1A2,</b><br>ABCC2, ABCG2,<br><b>SLCO1B1,</b><br><b>SLCO2B1,</b><br>ABCB11,<br><b>SLCO1B3</b> | ALB, ORM1 |
| Interferon alfa-2b, recombinant | DB00105 | Immunostimulants                               | IFNAR2, IFNAR1            | CYP1A2                                                                                                               |                                                                                                                             |           |
| Famotidine                      | DB00927 | Gastrointestinal Agents                        | HRH2                      | CYP1A2                                                                                                               | SLC22A6,<br>SLC22A8,<br>SLC22A2,<br>SLC47A1                                                                                 |           |
| Rintatolimod                    |         |                                                |                           |                                                                                                                      |                                                                                                                             |           |
| EIDD-2801                       | DB15661 | Experimental Unapproved treatment for COVID-19 |                           |                                                                                                                      |                                                                                                                             |           |

|                         |         |                                            |                      |                                                                                                                                                               |                                       |     |
|-------------------------|---------|--------------------------------------------|----------------------|---------------------------------------------------------------------------------------------------------------------------------------------------------------|---------------------------------------|-----|
| Peginterferon lambda-1a | DB14767 |                                            |                      |                                                                                                                                                               |                                       |     |
| AT-527                  |         |                                            |                      |                                                                                                                                                               |                                       |     |
| Merimepodib             | DB04862 | Benzene Derivatives                        |                      |                                                                                                                                                               |                                       |     |
| Disulfiram              | DB00822 | Nervous system drugs                       | ALDH2, DBH           | CYP2E1,<br>CYP3A4,<br>CYP3A5                                                                                                                                  | ABCB11                                |     |
| <b>Others</b>           |         |                                            |                      |                                                                                                                                                               |                                       |     |
| Deferoxamine            | DB00746 | Antagonist                                 | APP                  | XDH                                                                                                                                                           |                                       |     |
| Tranexamic Acid         | DB00302 | Hemostatics                                | PLG                  |                                                                                                                                                               | <b>SLC15A2</b>                        |     |
| Ruxolitinib             | DB08877 | Antineoplastic and Immunomodulating Agents | JAK1, JAK2           | CYP3A4                                                                                                                                                        |                                       |     |
| Sirolimus               | DB00877 | Immunosuppressants                         | MTOR, FKBP1A, FGF2   | CYP3A4,<br>CYP3A5,<br>CYP3A7                                                                                                                                  | ABCB1,<br><b>SLCO1B1</b> ,<br>SLC47A1 |     |
| Enoxaparin              | DB01225 | Cardiovasucular Agents                     | <b>SERPINC1, F10</b> | MPO,                                                                                                                                                          |                                       |     |
| Fluvoxamine             | DB00176 | Antidepressants                            | SLC6A4, KCNH2        | <b>CYP2D6,</b><br><b>CYP1A2,</b><br><b>CYP1A1,</b><br><b>CYP3A4,</b><br><b>CYP2C9,</b><br><b>CYP2C19,</b><br><b>CYP2B6</b>                                    | ABCB1, ABCB11                         |     |
| Chlorhexidine           | DB00878 | Anti Infective Agents                      |                      |                                                                                                                                                               |                                       | ALB |
| Acalabrutinib           | DB11703 | Antineoplastic and Immunomodulating Agents | BTK                  | CYP3A4,<br>CYP3A5                                                                                                                                             |                                       | ALB |
| AT-001                  | DB15121 |                                            |                      |                                                                                                                                                               |                                       |     |
| Dapagliflozin           | DB06292 | Blood Glucose lowering Agents              | SLC5A2               | <b>CYP1A1,</b><br><b>CYP1A2,</b><br><b>CYP2A6,</b><br><b>CYP2C9,</b><br><b>CYP2D6,</b><br><b>CYP3A4,</b><br><b>UGT1A9,</b><br><b>UGT2B4,</b><br><b>UGT2B7</b> | ABCB1                                 |     |

|                       |         |                                                |                                                                             |                                                                                  |                                                                                   |          |
|-----------------------|---------|------------------------------------------------|-----------------------------------------------------------------------------|----------------------------------------------------------------------------------|-----------------------------------------------------------------------------------|----------|
| Progesterone          | DB00396 | Neurology Drugs                                | PGR, ESR1, NR3C2, CYP17A1, OPRK1, ORM1, NR3C1, AR, SHBG, ESR2               | CYP3A5, CYP2C9, CYP3A7, CYP2C19, CYP3A4, CYP17A1, CYP1A1, CYP1B1, CYP2A6, CYP2D6 | ABCB1, SLC22A2, SLC22A1, SLC22A3, ABCB11, ABCC1, SLC10A1, SLC01B1, ABCG2, SLC01B3 |          |
| Acetylcysteine        | DB06151 | Anti-Infective Agents                          | GSS, SLC7A11, ACY1, IKBKB, CHUK, GRIN2B, GRIN1, GRIN2A, GRIN2D, GRIN3A      |                                                                                  | SLC01B1, SLC22A6                                                                  |          |
| Heparin               | DB01109 | Cardiovascular Agents                          | SERPINC1, F10, SELP, FGFR4, FGF4, FGF19, FGFR1, FGF1, FGFR2, FGF2, PF4, HGF | HPSE                                                                             |                                                                                   | SERPINA7 |
| Dornase Alfa          | DB00003 | Respiratory System Drugs                       |                                                                             |                                                                                  |                                                                                   |          |
| Nitric Oxide          | DB00435 | Respiratory System Drugs                       | GUCY1A2, MT1A, IDO1                                                         | ALDH2, CYP1A2, CYP2B6, CYP3A4                                                    |                                                                                   |          |
| Galidesivir           | DB11676 | Experimental Unapproved Treatment for COVID-19 |                                                                             |                                                                                  |                                                                                   |          |
| Human interferon beta | DB14999 | Anti-Infective Agents                          | IFNAR1                                                                      | CYP1A2                                                                           |                                                                                   | ALB      |
| Triazavirin           | DB15622 | Antiviral Agents                               |                                                                             |                                                                                  |                                                                                   |          |
| TMC-310911            | DB15623 | Antiviral Agents                               |                                                                             |                                                                                  |                                                                                   |          |
| AZD1222               | DB15656 | Experimental Unapproved Treatment for COVID-19 |                                                                             |                                                                                  |                                                                                   |          |

|                    |         |                                                |                                                                         |                                                                                |                                     |     |
|--------------------|---------|------------------------------------------------|-------------------------------------------------------------------------|--------------------------------------------------------------------------------|-------------------------------------|-----|
| Fingolimod         | DB08868 | Immunosuppressants                             | <b>S1PR5, HDAC1, S1PR1, S1PR4, S1PR3</b>                                | SPHK1, CYP2E1, <b>CYP4F2</b>                                                   | SLC1A2, SLC1A3, ABCB1, <b>ABCC1</b> |     |
| Methylprednisolone | DB00959 | Corticosteroids                                | <b>NR3C1, ANXA1</b>                                                     | CYP3A4, <b>CYP2A6</b> , CYP1B1, CYP2B6, <b>CYP2C8</b> , CYP2C19, <b>CYP2C9</b> | ABCB1                               | ALB |
| Bevacizumab        | DB00112 | Antineoplastic and Immunomodulating Agents     | VEGFA, C1QA, C1QB, C1QC, FCGR3A, FCGR1A, <b>FCGR2A</b> , FCGR2B, FCGR2C |                                                                                |                                     |     |
| Azithromycin       | DB00207 | Anti-Bacterial Agents                          | PADI4                                                                   | CYP3A4                                                                         | ABCB1, ABCC2                        |     |
| N4-Hydroxycytidine | DB15660 | Experimental Unapproved Treatment for COVID-19 |                                                                         |                                                                                |                                     |     |
| Elbasvir           | DB11574 | Antiviral Agents                               |                                                                         | CYP3A4, CYP3A5, CYP3A7, <b>CYP3A43</b>                                         | ABCB1                               |     |
| GS-441524          | DB15686 | Antiviral Agents                               | rep (SARS COV-2)                                                        |                                                                                |                                     |     |
| Tridecactide       | DB15687 | Experimental Unapproved Treatment for COVID-19 |                                                                         |                                                                                |                                     |     |
| Metenkefalin       | DB12668 | Experimental Unapproved Treatment for COVID-19 | OPRD1, <b>OPRM1</b>                                                     | <b>CPA6</b>                                                                    |                                     |     |
| Vazegepant         | DB15688 | Experimental Unapproved Treatment for COVID-19 | CALCRL                                                                  |                                                                                |                                     |     |



|                              |         |                                                |                                                                    |                                                                         |                                                                   |     |
|------------------------------|---------|------------------------------------------------|--------------------------------------------------------------------|-------------------------------------------------------------------------|-------------------------------------------------------------------|-----|
| Ibuprofen                    | DB01050 | Analgesics                                     | PTGS2, PTGS1, BCL2, THBD, FABP2, PPARG, CFTR, PPARA, GP1BA, S100A7 | CYP2C9, CYP2C8, CYP2C19, UGT1A3, UGT1A9, UGT2B4, UGT2B7, UGT2B7, CYP3A4 | SLCO2B1, ABCB1, ABCC4, ABCC1, SLCO1A2, SLC22A6, SLC22A8, SLC22A11 | ALB |
| Anti-SARS-CoV-2 REGN-COV2    | DB15691 | Experimental Unapproved Treatment for COVID-19 |                                                                    |                                                                         |                                                                   |     |
| COVID-19 convalescent plasma | DB15692 | Experimental Unapproved Treatment for COVID-19 |                                                                    |                                                                         |                                                                   |     |
| INO-4800                     | DB15693 | Experimental Unapproved Treatment for COVID-19 |                                                                    |                                                                         |                                                                   |     |
| Colchicine                   | DB01394 | Musculoskeletal System                         | TUBB                                                               | CYP3A4, CYP2B6, CYP2C8, CYP2E1                                          | ABCB1                                                             | ALB |
| LY-CoV555                    | DB15718 | Experimental Unapproved Treatment for COVID-19 |                                                                    |                                                                         |                                                                   |     |
