# Supplementary material
Source: PubMed Central journal article supplement (PMC8216321)
Supplement: Supplementary_Table_2.pdf [file Supplementary_Table_2.pdf]

**Supplementary Table 2: Clinically significant PharmGKB variants associated with COVID-19 treatment among Indians and their allele frequencies in Indians and other global populations**

| CHR | POS (hg38) | REF | ALT | VARIANT    | GENE        | TYPE                       | LEVEL OF EVIDENCE | CHEMICAL                                                                                                         | INDIGEN | QATAR    | gnomAD_ALL | gnomAD_AFR | gnomAD_AMR | gnomAD_AS | gnomAD_SAS | gnomAD_AMI | gnomAD_ASI | gnomAD_FIN | gnomAD_NFE | gnomAD_OTH | 1KGP3_ALL | 1KGP3_AFR | 1KGP3_AMR | 1KGP3_AS | 1KGP3_SAS | 1KGP3_EUR |
|-----|------------|-----|-----|------------|-------------|----------------------------|-------------------|------------------------------------------------------------------------------------------------------------------|---------|----------|------------|------------|------------|-----------|------------|------------|------------|------------|------------|------------|-----------|-----------|-----------|----------|-----------|-----------|
| 19  | 39248147   | C   | T   | rs12979860 | IFNL3,IFNL4 | Efficacy                   | 1A                | boceprevir,peginterferon alfa-2b,ribavirin                                                                       | 0.208   | 0.323864 | 0.3938     | 0.5995     | 0.3721     | 0.0655    | 0.2213     | 0.3615     | 0.3917     | 0.2409     | 0.315      | 0.3619     | 0.355831  | 0.6694    | 0.3991    | 0.0804   | 0.2331    | 0.3091    |
| 19  | 39248147   | C   | T   | rs12979860 | IFNL3,IFNL4 | Efficacy                   | 1A                | daclatasvir,peginterferon alfa-2a,peginterferon alfa-2b,ribavirin                                                | 0.208   | 0.323864 | 0.3938     | 0.5995     | 0.3721     | 0.0655    | 0.2213     | 0.3615     | 0.3917     | 0.2409     | 0.315      | 0.3619     | 0.355831  | 0.6694    | 0.3991    | 0.0804   | 0.2331    | 0.3091    |
| 19  | 39248147   | C   | T   | rs12979860 | IFNL3,IFNL4 | Efficacy                   | 1A                | peginterferon alfa-2a,peginterferon alfa-2b,ribavirin                                                            | 0.208   | 0.323864 | 0.3938     | 0.5995     | 0.3721     | 0.0655    | 0.2213     | 0.3615     | 0.3917     | 0.2409     | 0.315      | 0.3619     | 0.355831  | 0.6694    | 0.3991    | 0.0804   | 0.2331    | 0.3091    |
| 19  | 39248147   | C   | T   | rs12979860 | IFNL3,IFNL4 | Efficacy                   | 1A                | peginterferon alfa-2a,peginterferon alfa-2b,ribavirin,simeprevir                                                 | 0.208   | 0.323864 | 0.3938     | 0.5995     | 0.3721     | 0.0655    | 0.2213     | 0.3615     | 0.3917     | 0.2409     | 0.315      | 0.3619     | 0.355831  | 0.6694    | 0.3991    | 0.0804   | 0.2331    | 0.3091    |
| 19  | 39248147   | C   | T   | rs12979860 | IFNL3,IFNL4 | Efficacy                   | 1A                | peginterferon alfa-2a,peginterferon alfa-2b,ribavirin,telaprevir                                                 | 0.208   | 0.323864 | 0.3938     | 0.5995     | 0.3721     | 0.0655    | 0.2213     | 0.3615     | 0.3917     | 0.2409     | 0.315      | 0.3619     | 0.355831  | 0.6694    | 0.3991    | 0.0804   | 0.2331    | 0.3091    |
| 19  | 39252525   | T   | G   | rs8099917  | IFNL3       | Efficacy                   | 1B                | interferons,peginterferon alfa-2a,peginterferon alfa-2b,ribavirin                                                | 0.1453  | 0.136364 | 0.1552     | 0.0702     | 0.2588     | 0.0591    | 0.1472     | 0.1944     | 0.2037     | 0.1293     | 0.1945     | 0.1647     | 0.13119   | 0.0424    | 0.2767    | 0.0764   | 0.1667    | 0.168     |
| 19  | 39252525   | T   | G   | rs8099917  | IFNL3       | Efficacy                   | 1B                | peginterferon alfa-2a,peginterferon alfa-2b,ribavirin,telaprevir                                                 | 0.1453  | 0.136364 | 0.1552     | 0.0702     | 0.2588     | 0.0591    | 0.1472     | 0.1944     | 0.2037     | 0.1293     | 0.1945     | 0.1647     | 0.13119   | 0.0424    | 0.2767    | 0.0764   | 0.1667    | 0.168     |
| 22  | 19963748   | G   | A   | rs4680     | COMT        | Efficacy                   | 2A                | nicotine                                                                                                         | 0.4273  | 0.564193 | 0.4406     | 0.3112     | 0.4086     | 0.2676    | 0.4454     | 0.667      | 0.4476     | 0.5531     | 0.5189     | 0.4107     | 0.369209  | 0.2806    | 0.3775    | 0.2798   | 0.4407    | 0.5       |
| 7   | 99672916   | T   | C   | rs776746   | CYP3A5      | Dosage                     | 2A                | sirolimus                                                                                                        | 0.7059  | 0.232955 | 0.7225     | 0.3103     | 0.7825     | 0.7184    | 0.6884     | 0.9356     | 0.919      | 0.9346     | 0.9309     | 0.7388     | -         | -         | -         | -        | -         | -         |
| 19  | 39244283   | A   | G   | rs11881222 | IFNL3       | Efficacy                   | 2A                | peginterferon alfa-2a,peginterferon alfa-2b,ribavirin                                                            | 0.1989  | 0.306818 | 0.3001     | 0.3276     | 0.3437     | 0.0657    | 0.2097     | 0.3241     | 0.387      | 0.2204     | 0.2972     | 0.2827     | 0.251198  | 0.3071    | 0.3718    | 0.0843   | 0.2188    | 0.2932    |
| 12  | 47879112   | A   | G   | rs2228570  | VDR         | Efficacy                   | 2A                | peginterferon alfa-2b,ribavirin                                                                                  | 0.737   | 0.727273 | 0.6636     | 0.778      | 0.5783     | 0.5474    | 0.7283     | 0.7405     | 0.5717     | 0.645      | 0.6167     | 0.662      | 0.671526  | 0.8109    | 0.5173    | 0.5823   | 0.7352    | 0.6223    |
| 15  | 78601997   | G   | A   | rs1051730  | CHRNA3      | Toxicity/ADR               | 2B                | nicotine                                                                                                         | 0.1874  | 0.339303 | 0.2589     | 0.119      | 0.2362     | 0.031     | 0.2211     | 0.4198     | 0.3814     | 0.3272     | 0.3475     | 0.2705     | 0.168131  | 0.087     | 0.2161    | 0.0268   | 0.183     | 0.3688    |
| 15  | 78601997   | G   | A   | rs1051730  | CHRNA3      | Dosage                     | 2B                | nicotine                                                                                                         | 0.1874  | 0.339303 | 0.2589     | 0.119      | 0.2362     | 0.031     | 0.2211     | 0.4198     | 0.3814     | 0.3272     | 0.3475     | 0.2705     | 0.168131  | 0.087     | 0.2161    | 0.0268   | 0.183     | 0.3688    |
| 15  | 78596058   | G   | A   | rs578776   | CHRNA3      | Toxicity/ADR,Metabolism/PK | 2B                | nicotine                                                                                                         | 0.5122  | 0.357955 | 0.3939     | 0.5365     | 0.524      | 0.7727    | 0.4711     | 0.1689     | 0.2649     | 0.3202     | 0.273      | 0.4047     | 0.554712  | 0.6036    | 0.5965    | 0.8006   | 0.4867    | 0.2813    |
| 15  | 78590583   | G   | A   | rs16969968 | CHRNA5      | Toxicity/ADR               | 2B                | nicotine                                                                                                         | 0.186   | 0.334328 | 0.2402     | 0.0608     | 0.2291     | 0.0304    | 0.2224     | 0.4074     | 0.3766     | 0.328      | 0.3465     | 0.2512     | 0.149561  | 0.0234    | 0.2089    | 0.0268   | 0.182     | 0.3658    |
| 1   | 154576404  | G   | A   | rs2072661  | CHRN2       | Efficacy,Toxicity/ADR      | 2B                | nicotine                                                                                                         | 0.205   | 0.232955 | 0.2538     | 0.2803     | 0.2314     | 0.2732    | 0.1996     | 0.3056     | 0.1884     | 0.3046     | 0.2373     | 0.2537     | 0.264577  | 0.2821    | 0.2378    | 0.3175   | 0.2025    | 0.2674    |
| 6   | 35702206   | A   | G   | rs4713916  | FKBP5       | Efficacy                   | 2B                | antidepressants,citalopram,fluoxetine,mirtazapine,paroxetine,Selective serotonin reuptake inhibitors,venlafaxine | 0.6885  | 0.721591 | 0.7697     | 0.8948     | 0.7286     | 0.7617    | 0.6749     | 0.7483     | 0.7941     | 0.7322     | 0.7076     | 0.7528     | 0.777955  | 0.9425    | 0.7392    | 0.7937   | 0.6646    | 0.6829    |

|    |          |    |   |            |         |                                       |    |                                                                                             |        |           |        |        |        |        |        |        |        |        |        |        |          |        |        |        |        |        |
|----|----------|----|---|------------|---------|---------------------------------------|----|---------------------------------------------------------------------------------------------|--------|-----------|--------|--------|--------|--------|--------|--------|--------|--------|--------|--------|----------|--------|--------|--------|--------|--------|
| 20 | 3213196  | C  | A | rs1127354  | ITPA    | Dosage                                | 2B | interferon alfa-2b, recombinant, ribavirin                                                  | 0.1241 | 0.0383085 | 0.0623 | 0.0444 | 0.0364 | 0.1777 | 0.1222 | 0.0768 | 0.0689 | 0.0484 | 0.0731 | 0.0539 | 0.089457 | 0.0446 | 0.0418 | 0.1687 | 0.1217 | 0.0706 |
| 20 | 3213196  | C  | A | rs1127354  | ITPA    | Toxicity/ADR                          | 2B | peginterferon alfa-2b, ribavirin                                                            | 0.1241 | 0.0383085 | 0.0623 | 0.0444 | 0.0364 | 0.1777 | 0.1222 | 0.0768 | 0.0689 | 0.0484 | 0.0731 | 0.0539 | 0.089457 | 0.0446 | 0.0418 | 0.1687 | 0.1217 | 0.0706 |
| 20 | 3213247  | A  | C | rs7270101  | ITPA    | Toxicity/ADR                          | 2B | peginterferon alfa-2b, ribavirin                                                            | 0.0225 | 0.0795455 | 0.0972 | 0.0728 | 0.0939 | 0.001  | 0.025  | 0.0267 | 0.0797 | 0.065  | 0.1286 | 0.1041 | 0.059105 | 0.0711 | 0.0821 | -      | 0.0153 | 0.1292 |
| 12 | 21178615 | T  | C | rs4149056  | SLCO1B1 | Metabolism/PK                         | 2B | lopinavir                                                                                   | 0.0513 | 0.238454  | 0.1195 | 0.0325 | 0.1295 | 0.1276 | 0.0457 | 0.0656 | 0.1743 | 0.2178 | 0.159  | 0.1227 | 0.08766  | 0.0136 | 0.134  | 0.123  | 0.0429 | 0.161  |
| 4  | 68816218 | G  | T | rs61750900 | UGT2B10 | Metabolism/PK                         | 2B | nicotine                                                                                    | 0.025  | 0.0227273 | 0.0691 | 0.0445 | 0.0647 | 0.0013 | 0.0352 | 0.0678 | 0.0648 | 0.0584 | 0.0929 | 0.0696 | 0.04393  | 0.0356 | 0.072  | 0.001  | 0.0307 | 0.0915 |
| 19 | 39248514 | CT | T | rs11322783 | IFNL4   | Efficacy                              | 2B | boceprevir, peginterferon alfa-2a, peginterferon alfa-2b, ribavirin, simeprevir, telaprevir | 0.2121 | 0         | 0.4043 | 0.631  | 0.3765 | 0.0614 | 0.2293 | 0.3584 | 0.3906 | 0.2401 | 0.3171 | 0.3713 | 0.368211 | 0.7073 | 0.4035 | 0.0813 | 0.2393 | 0.3111 |
|    |          |    |   | CYP2C9*2   | CYP2C9  | Metabolism/PK                         | 1A | ibuprofen                                                                                   | 0.0306 |           |        |        |        |        |        |        |        |        |        |        | 0.0584   | 0.0083 | 0.0994 | 0.0009 | 0.0347 | 0.1242 |
|    |          |    |   | CYP2C9*3   | CYP2C9  | Metabolism/PK                         | 1A | ibuprofen                                                                                   | 0.1083 |           |        |        |        |        |        |        |        |        |        |        | 0.0591   | 0.0022 | 0.0374 | 0.0337 | 0.1094 | 0.0725 |
|    |          |    |   | CYP2C8*3   | CYP2C8  | Metabolism/PK                         | 2A | ibuprofen                                                                                   | 0.0208 |           |        |        |        |        |        |        |        |        |        |        | 0.0557   | 0.4266 | 0.0994 | 0.0009 | 0.0296 | 0.1182 |
|    |          |    |   | UGT1A1*28  | UGT1A1  | Toxicity/ADR                          | 1A | atazanavir / ritonavir                                                                      | 0.4047 |           |        |        |        |        |        |        |        |        |        |        | 0.3919   | 0.0083 | 0.3616 | 0.114  | 0.3946 | 0.2922 |
|    |          |    |   | CYP2A6*19  | CYP2A6  | Metabolism/PK                         | 2A | nicotine                                                                                    | 0.0014 |           |        |        |        |        |        |        |        |        |        |        | 0.0111   | 0.5143 | 0.023  | 0.5694 | 0.0531 | 0.0159 |
|    |          |    |   | CYP2A6*7   | CYP2A6  | Metabolism/PK                         | 2A | nicotine                                                                                    | 0.0087 |           |        |        |        |        |        |        |        |        |        |        | 0.00389  | 0.002  | 0.0057 | 0.0019 | 0.002  | 0.0188 |
|    |          |    |   | CYP2A6*2   | CYP2A6  | Metabolism/PK                         | 2A | nicotine                                                                                    | 0.0082 |           |        |        |        |        |        |        |        |        |        |        | 0.0017   | 0.0665 | 0.1282 | 0      | 0.1094 | 0.1858 |
|    |          |    |   | CYP2A6*20  | CYP2A6  | Metabolism/PK                         | 2A | nicotine                                                                                    | 0      |           |        |        |        |        |        |        |        |        |        |        | 0.00194  | 0.0007 | 0.0028 | 0      | 0.001  | 0.0198 |
|    |          |    |   | CYP2A6*26  | CYP2A6  | Metabolism/PK                         | 2A | nicotine                                                                                    | 0      |           |        |        |        |        |        |        |        |        |        |        | 0        | 0.0007 | 0.0072 | 0      | 0.0061 | 0.0337 |
|    |          |    |   | CYP2A6*27  | CYP2A6  | Metabolism/PK                         | 2A | nicotine                                                                                    | 0      |           |        |        |        |        |        |        |        |        |        |        | 0        | 0.0113 | 0      | 0      | 0      | 0      |
|    |          |    |   | CYP2D6*10  | CYP2D6  | Efficacy, Toxicity/ADR, Metabolism/PK | 1A | fluvoxamine                                                                                 | 0.0772 |           |        |        |        |        |        |        |        |        |        |        | 0.1759   | 0.0052 | 0      | 0      | 0      | 0      |
|    |          |    |   | CYP2D6*4   | CYP2D6  | Efficacy, Toxicity/ADR, Metabolism/PK | 1A | fluvoxamine                                                                                 | 0.0937 |           |        |        |        |        |        |        |        |        |        |        | 0.00608  | 0.006  | 0      | 0      | 0      | 0      |
|    |          |    |   | CYP2D6*3   | CYP2D6  | Efficacy, Toxicity/ADR, Metabolism/PK | 1A | fluvoxamine                                                                                 | 0      |           |        |        |        |        |        |        |        |        |        |        | 0.1134   | 0      | 0      | 0      | 0      | 0      |
|    |          |    |   | CYP2D6*6   | CYP2D6  | Efficacy, Toxicity/ADR, Metabolism/PK | 1A | fluvoxamine                                                                                 | 0      |           |        |        |        |        |        |        |        |        |        |        | 0.0584   | 0      | 0      | 0      | 0      | 0      |
