# Supplementary material
Source: PubMed Central journal article supplement (PMC8216321)
Supplement: Supplementary_Table_3.pdf [file Supplementary_Table_3.pdf]

**Supplementary Table 3: Potentially deleterious PGx variants associated with COVID-19 therapy among Indians (AF > 1%) and their allele frequencies in Indians and other global populations**

| CHR   | POS       | REF | ALT | GENE             | VARIANT     | INDIGEN | 1KGP3_ALL | 1KGP3_AF_R | 1KGP3_EUR | 1KGP3_SAS | 1KGP3_EAS | 1KGP3_AMR | gnomAD_ALL | gnomAD_AF_R | gnomAD_AMI | gnomAD_AMR | gnomAD_ASJ | gnomAD_EAS | gnomAD_FIN | gnomAD_NFE | gnomAD_OT_H | gnomAD_SAS | GME_ALL  | GME_NWA  | GME_NEA  | GME_AP   | GME_Israel | GME_SD   | GME_TP   | GME_CA  |
|-------|-----------|-----|-----|------------------|-------------|---------|-----------|------------|-----------|-----------|-----------|-----------|------------|-------------|------------|------------|------------|------------|------------|------------|-------------|------------|----------|----------|----------|----------|------------|----------|----------|---------|
| chr22 | 42127526  | C   | T   | CYP2D6           | rs1058172   | 0.078   | 0         | 0          | 0         | 0         | 0         | 0         | 0.0538     | 0.0137      | 0.1394     | 0.0417     | 0.0632     | 0.0003     | 0.0394     | 0.0917     | 0.0551      | 0.0321     | 0.086768 | 0.064516 | 0.080601 | 0.095833 | 0.055556   | 0.112069 | 0.097403 | 0.09615 |
| chr10 | 95058362  | G   | C   | CYP2C8           | rs1058930   | 0.013   | 0.0165735 | 0.0038     | 0.0577    | 0.0072    | 0         | 0.0187    | 0.0358     | 0.0122      | 0.05       | 0.0318     | 0.0184     | 0          | 0.0576     | 0.0519     | 0.0358      | 0.0168     | 0.021652 | 0.045455 | 0.024457 | 0.008772 | 0.05       | 0.008621 | 0.027439 | 0.00758 |
| chr22 | 42130692  | G   | A   | CYP2D6           | rs1065852   | 0.193   | 0.238019  | 0.1127     | 0.2018    | 0.1646    | 0.5714    | 0.1484    | 0.1865     | 0.1247      | 0.3029     | 0.1531     | 0.242      | 0.5647     | 0.1118     | 0.223      | 0.195       | 0.1751     | 0.130778 | 0.117647 | 0.114754 | 0.114407 | 0.142857   | 0.178571 | 0.155172 | 0.12302 |
| chr22 | 42128181  | A   | T   | CYP2D6           | rs1135828   | 0.02    | 0.0041933 | 0          | 0         | 0.0204    | 0         | 0.0014    | 0.0007     | 0.0002      | 0          | 0.0035     | 0          | 0          | 0          | 0          | 0.001       | 0.0164     | .        | .        | .        | .        | .          | .        | .        | .       |
| chr3  | 121928439 | C   | T   | SLC15A2          | rs1143671   | 0.32    | 0.451877  | 0.4834     | 0.4235    | 0.2965    | 0.6984    | 0.2939    | 0.4469     | 0.4833      | 0.5078     | 0.3071     | 0.3905     | 0.6931     | 0.4071     | 0.4566     | 0.4167      | 0.3113     | 0.35146  | 0.358586 | 0.375    | 0.333333 | 0.4        | 0.37069  | 0.365854 | 0.2803  |
| chr12 | 21304500  | T   | G   | SLC01A2          | rs11568563  | 0.017   | 0.0263578 | 0.0144     | 0.0686    | 0.0164    | 0         | 0.0403    | 0.0438     | 0.0177      | 0.0601     | 0.0408     | 0.0316     | 0          | 0.0745     | 0.0596     | 0.0563      | 0.0223     | 0.011581 | 0.010101 | 0.009511 | 0.01462  | 0          | 0        | 0.02439  | 0.01515 |
| chr13 | 95210754  | C   | A   | ABCC4            | rs11568658  | 0.078   | 0.0517173 | 0          | 0.0308    | 0.0644    | 0.12      | 0.0634    | 0.0299     | 0.0051      | 0.1367     | 0.0908     | 0.0409     | 0.1067     | 0.0452     | 0.0234     | 0.0386      | 0.0563     | 0.034743 | 0.020202 | 0.028533 | 0.038012 | 0.1        | 0.017241 | 0.045732 | 0.05303 |
| chr13 | 95083266  | C   | A   | ABCC4            | rs11568694  | 0.029   | 0.0075879 | 0          | 0.006     | 0.0276    | 0         | 0.0072    | 0.0047     | 0.0014      | 0.0067     | 0.0047     | 0.0063     | 0          | 0.0002     | 0.0068     | 0.0042      | 0.0231     | 0.014099 | 0.015152 | 0.008152 | 0.002924 | 0          | 0.008621 | 0.030488 | 0.02652 |
| chr10 | 95058349  | T   | A   | CYP2C8           | rs11572103  | 0.011   | 0.0547125 | 0.1891     | 0.004     | 0.0123    | 0         | 0.0115    | 0.0485     | 0.1511      | 0          | 0.0154     | 0.0156     | 0          | 0.0002     | 0.0029     | 0.0455      | 0.0181     | 0.024673 | 0.040404 | 0.038043 | 0.02924  | 0          | 0.025862 | 0.006098 | 0.01894 |
| chr16 | 56639315  | C   | A   | MT1A             | rs11640851  | 0.471   | 0.470647  | 0.2254     | 0.6441    | 0.5153    | 0.4752    | 0.6167    | 0.5357     | 0.2882      | 0.5605     | 0.6107     | 0.6211     | 0.4593     | 0.7144     | 0.6513     | 0.5722      | 0.5039     | 0.628399 | 0.606061 | 0.616848 | 0.628655 | 0.6        | 0.62069  | 0.676829 | 0.63636 |
| chr6  | 160122116 | C   | T   | SLC22A1          | rs12208357  | 0.024   | 0.0203674 | 0.0038     | 0.0626    | 0.0204    | 0         | 0.0202    | 0.0486     | 0.0114      | 0.1089     | 0.028      | 0.0945     | 0.0003     | 0.0596     | 0.076      | 0.0399      | 0.0269     | 0.049345 | 0.025253 | 0.046196 | 0.052632 | 0.05       | 0.043103 | 0.079268 | 0.02652 |
| chr21 | 41480570  | C   | T   | TM6RS2           | rs12329760  | 0.244   | 0.261382  | 0.2867     | 0.2356    | 0.226     | 0.3621    | 0.1542    | 0.2531     | 0.2877      | 0.2467     | 0.1549     | 0.1382     | 0.4022     | 0.3942     | 0.2284     | 0.2314      | 0.2475     | 0.178751 | 0.151515 | 0.1875   | 0.170588 | 0.15       | 0.172414 | 0.164634 | 0.22349 |
| chr4  | 69480847  | A   | T   | UGT2B4           | rs13119049  | 0.074   | 0.130591  | 0.1362     | 0.2266    | 0.0951    | 0         | 0.2205    | 0.2019     | 0.1491      | 0.2164     | 0.2272     | 0.1736     | 0.001      | 0.2125     | 0.2457     | 0.1955      | 0.0892     | 0.163821 | 0.234694 | 0.154891 | 0.026612 | 0.15       | 0.172414 | 0.154088 | 0.12977 |
| chr19 | 15886018  | G   | C   | CYP4F2           | rs145174239 | 0.018   | 0.0041933 | 0          | 0.003     | 0.0184    | 0         | 0         | 0.0043     | 0.0014      | 0          | 0.0015     | 0.0045     | 0          | 0.0008     | 0.007      | 0.0033      | 0.0171     | 0.003171 | 0        | 0        | 0        | 0          | 0        | 0.003049 | 0.01515 |
| chr19 | 40849872  | C   | T   | CYP2A6           | rs145308399 | 0.02    | 0.0051917 | 0.0015     | 0.001     | 0.0215    | 0.001     | 0.0014    | 0.002      | 0.0005      | 0          | 0.0022     | 0.0066     | 0          | 0.0004     | 0.0022     | 0.0014      | 0.0211     | 0.003838 | 0        | 0        | 0.008197 | 0          | 0        | 0.003226 | 0.01172 |
| chr1  | 161510947 | C   | T   | FCGR2A           | rs147892588 | 0.012   | 0.0025959 | 0.0008     | 0         | 0.0123    | 0         | 0         | 0.0004     | 0.0005      | 0          | 0          | 0          | 0          | 0          | 0.0002     | 0           | 0.0105     | 0.001007 | 0        | 0        | 0        | 0          | 0        | 0        | 0       |
| chr8  | 38457381  | C   | G   | FGFR1            | rs17175750  | 0.01    | 0.0027955 | 0          | 0         | 0.0143    | 0         | 0         | 0.0002     | 0           | 0          | 0          | 0          | 0          | 0          | 0          | 0           | 0          | 0        | 0        | 0        | 0        | 0          | 0        | 0        | 0       |
| chr1  | 17342114  | C   | T   | PADI4            | rs1748020   | 0.028   | 0.0511182 | 0.1135     | 0.0577    | 0.0286    | 0.001     | 0.0274    | 0.0625     | 0.0965      | 0.0544     | 0.0304     | 0.0307     | 0.0019     | 0.059      | 0.0544     | 0.053       | 0.0283     | 0.015106 | 0.040404 | 0.016304 | 0.050848 | 0.05       | 0.008621 | 0.006098 | 0.01515 |
| chr8  | 67509533  | G   | C   | CPA6             | rs17853192  | 0.091   | 0.0890575 | 0.003      | 0.0905    | 0.0879    | 0.1974    | 0.0951    | 0.0662     | 0.0163      | 0.0233     | 0.0883     | 0.0632     | 0.2173     | 0.0906     | 0.0821     | 0.0637      | 0.0984     | 0.069052 | 0.045455 | 0.050272 | 0.108187 | 0.1        | 0.086207 | 0.076687 | 0.08712 |
| chr10 | 94942290  | C   | T   | CYP2C9           | rs1799853   | 0.031   | 0.0479233 | 0.0083     | 0.1243    | 0.0348    | 0.001     | 0.0994    | 0.0886     | 0.0246      | 0.1533     | 0.0967     | 0.1363     | 0.0003     | 0.1183     | 0.1269     | 0.096       | 0.0359     | 0.100746 | 0.056701 | 0.101902 | 0.123967 | 0.15       | 0.155172 | 0.111801 | 0.09615 |
| chr6  | 154039662 | A   | G   | OPRM1            | rs1799971   | 0.44    | 0.223442  | 0.0091     | 0.162     | 0.4182    | 0.3929    | 0.2003    | 0.1215     | 0.0301      | 0.1492     | 0.1919     | 0.1743     | 0.3655     | 0.1989     | 0.1253     | 0.1447      | 0.3899     | 0.140483 | 0.121212 | 0.091033 | 0.149123 | 0.1        | 0.155172 | 0.125    | 0.23106 |
| chr22 | 46218377  | C   | G   | PPARA            | rs1800206   | 0.022   | 0.0227636 | 0.0053     | 0.0586    | 0.0245    | 0         | 0.0346    | 0.0424     | 0.0128      | 0.0679     | 0.0523     | 0.0389     | 0          | 0.0298     | 0.0641     | 0.0558      | 0.0201     | 0.028226 | 0.030303 | 0.036785 | 0.01462  | 0.1        | 0.025862 | 0.033537 | 0.02652 |
| chr11 | 113412762 | G   | C   | DRD2             | rs1801028   | 0.069   | 0.0317492 | 0.0008     | 0.0229    | 0.0879    | 0.0367    | 0.0173    | 0.0179     | 0.0044      | 0.0067     | 0.0218     | 0.0361     | 0.0349     | 0.0183     | 0.0221     | 0.0181      | 0.0627     | 0.041289 | 0.045455 | 0.03125  | 0.078947 | 0.05       | 0.068966 | 0.021341 | 0.02273 |
| chr22 | 36937615  | C   | A   | CSF2RB           | rs1801122   | 0.014   | 0.0107827 | 0.003      | 0.0288    | 0.0143    | 0         | 0.0101    | 0.0305     | 0.0072      | 0.0633     | 0.0242     | 0.0223     | 0.0003     | 0.053      | 0.0449     | 0.0274      | 0.0306     | 0.036261 | 0.036458 | 0.027397 | 0.044118 | 0          | 0.053571 | 0.046875 | 0.02652 |
| chrX  | 106034370 | C   | A   | SERPINA7         | rs1804495   | 0.281   | 0.179603  | 0.1107     | 0.1123    | 0.3189    | 0.2592    | 0.1031    | 0.1194     | 0.1187      | 0.2979     | 0.1009     | 0.1477     | 0.2387     | 0.0782     | 0.1144     | 0.1115      | 0.2863     | 0.162791 | 0.095238 | 0.139405 | 0.185771 | 0.142857   | 0.167471 | 0.150442 | 0.19474 |
| chrX  | 67545792  | G   | A   | AR               | rs199554641 | 0.021   | 0.0055629 | 0          | 0         | 0.0292    | 0         | 0         | 0.0002     | 0           | 0          | 0          | 0          | 0          | 0          | 0          | 0           | 0.0109     | 0.002753 | 0        | 0        | 0.003953 | 0          | 0        | 0        | 0.01579 |
| chr22 | 36935634  | C   | T   | CSF2RB           | rs200069235 | 0.015   | 0.0051917 | 0          | 0         | 0.0266    | 0         | 0         | 0.0004     | 2.38E-05    | 0          | 0          | 0          | 0.0003     | 0          | 1.55E-05   | 0.0005      | 0.0161     | 0.002014 | 0        | 0.002717 | 0.002924 | 0          | 0        | 0        | 0.00379 |
| chr2  | 233767133 | A   | G   | UGT1A*<br>UGT1A1 | rs200903749 | 0.014   | 0.0047923 | 0          | 0         | 0.0245    | 0         | 0         | 0.0003     | 0           | 0          | 0          | 0          | 0          | 0          | 0          | 0           | 0.0144     | 0.002073 | 0        | 0        | 0        | 0          | 0        | 0        | 0.00758 |
| chr15 | 89785440  | T   | C   | ANPEP            | rs201340495 | 0.012   | 0.0033946 | 0          | 0         | 0.0174    | 0         | 0         | 0.0003     | 2.38E-05    | 0          | 7.32E-05   | 0          | 0          | 0          | 0          | 0           | 0.0125     | 0.000505 | 0        | 0        | 0        | 0          | 0        | 0        | 0.00379 |
| chr2  | 233637352 | G   | A   | UGT1A10          | rs201411879 | 0.014   | 0.0047923 | 0          | 0         | 0.0245    | 0         | 0         | 0.0003     | 0           | 0          | 0          | 0          | 0          | 0          | 0          | 0           | 0.0155     | 0.002372 | 0        | 0        | 0        | 0          | 0        | 0        | 0.00833 |
| chr12 | 21178926  | A   | G   | SLC01B1          | rs201722521 | 0.037   | 0.0075879 | 0          | 0         | 0.0389    | 0         | 0         | 0.0008     | 7.14E-05    | 0          | 0          | 0          | 0          | 0          | 0          | 0.0005      | 0.0365     | 0.004541 | 0        | 0.001359 | 0        | 0          | 0.008621 | 0        | 0.01894 |
| chrX  | 67546320  | C   | T   | AR               | rs201934623 | 0.017   | 0.0074172 | 0          | 0         | 0.0376    | 0         | 0.0019    | 0.002      | 0.0003      | 0          | 0.0029     | 0.0024     | 0.0004     | 0.0002     | 0.0024     | 0.0019      | 0.0232     | 0.006267 | 0        | 0.003711 | 0.007937 | 0          | 0        | 0.00905  | 0.01579 |

|       |           |   |   |          |             |       |           |        |        |        |        |        |        |          |        |        |        |        |        |          |        |        |          |          |          |          |      |          |          |         |         |
|-------|-----------|---|---|----------|-------------|-------|-----------|--------|--------|--------|--------|--------|--------|----------|--------|--------|--------|--------|--------|----------|--------|--------|----------|----------|----------|----------|------|----------|----------|---------|---------|
| chr19 | 15879621  | C | T | CYP4F2   | rs2108622   | 0.401 | 0.236821  | 0.0825 | 0.2903 | 0.4131 | 0.2143 | 0.2378 | 0.2245 | 0.0991   | 0.2038 | 0.2615 | 0.3473 | 0.2391 | 0.198  | 0.286    | 0.2642 | 0.404  | 0.398288 | 0.378788 | 0.396739 | 0.453216 | 0.35 | 0.431034 | 0.365854 | 0.35985 |         |
| chr8  | 26864371  | A | C | ADRA1A   | rs2229125   | 0.027 | 0.0213658 | 0.0015 | 0.0219 | 0.0368 | 0.001  | 0.0663 | 0.0202 | 0.0049   | 0.0522 | 0.0464 | 0.0048 | 0.0003 | 0.0216 | 0.0253   | 0.0205 | 0.0296 | 0.013092 | 0        | 0.006793 | 0.01462  | 0    | 0.034483 | 0.018293 | 0.0303  |         |
| chr15 | 78588410  | G | A | CHRNA5   | rs2229961   | 0.012 | 0.0061901 | 0.0015 | 0.0129 | 0.0123 | 0      | 0.0058 | 0.0101 | 0.0032   | 0      | 0.0074 | 0.0027 | 0.0003 | 0.0025 | 0.017    | 0.0098 | 0.0164 | 0.011581 | 0.010101 | 0.006793 | 0.002924 | 0    | 0.008621 | 0.015244 | 0.01894 |         |
| chr11 | 3666396   | T | G | CHRNA10  | rs2231547   | 0.023 | 0.0219649 | 0.0015 | 0.0696 | 0.0164 | 0.001  | 0.0303 | 0.0465 | 0.0125   | 0.0958 | 0.0357 | 0.0491 | 0.0003 | 0.0783 | 0.0683   | 0.0422 | 0.0266 | 0.043807 | 0.055556 | 0.044837 | 0.020468 | 0.05 | 0.025862 | 0.064024 | 0.05303 |         |
| chr6  | 160136611 | C | T | SLC22A1  | rs2282143   | 0.101 | 0.0662939 | 0.0764 | 0.0089 | 0.0838 | 0.126  | 0.0187 | 0.0356 | 0.0666   | 0.0144 | 0.0376 | 0.0003 | 0.1199 | 0.0079 | 0.0153   | 0.0256 | 0.0891 | 0.024673 | 0.015152 | 0.029891 | 0.011696 | 0    | 0.008621 | 0.02439  | 0.03409 |         |
| chr22 | 42129819  | G | T | CYP2D6   | rs28371703  | 0.089 | 0.0692891 | 0.0204 | 0.173  | 0.0808 | 0.001  | 0.0951 | 0.1239 | 0.0384   | 0.229  | 0.1024 | 0.1832 | 0.0022 | 0.0921 | 0.192    | 0.1264 | 0.0885 | 0.080466 | 0.056701 | 0.066757 | 0.057088 | 0.15 | 0.146552 | 0.074074 | 0.08712 |         |
| chr19 | 15878779  | G | T | CYP4F2   | rs3093200   | 0.023 | 0.0623003 | 0.1581 | 0.0567 | 0.0225 | 0      | 0.0346 | 0.0805 | 0.1395   | 0.0356 | 0.0446 | 0.0449 | 0      | 0.0787 | 0.0599   | 0.0613 | 0.0295 | 0.035487 | 0.060606 | 0.027174 | 0.036885 | 0    | 0.043103 | 0.018519 | 0.04546 |         |
| chr9  | 89001928  | G | A | S1PR3    | rs34075341  | 0.043 | 0.0295527 | 0.0325 | 0.0437 | 0.045  | 0      | 0.0245 | 0.0352 | 0.0363   | 0.01   | 0.0288 | 0.0567 | 0.0003 | 0.0233 | 0.038    | 0.0344 | 0.0526 | 0.085599 | 0.070707 | 0.112772 | 0.090643 | 0.1  | 0.12069  | 0.039634 | 0.06818 |         |
| chr17 | 19681658  | C | T | SLC47A2  | rs4399035   | 0.013 | 0.0041933 | 0      | 0.007  | 0.0102 | 0      | 0.0058 | 0.0043 | 0.001    | 0.01   | 0.0056 | 0.0054 | 0      | 0.0004 | 0.0065   | 0.0079 | 0.0118 | 0.020141 | 0.020202 | 0.021739 | 0.017544 | 0    | 0.043103 | 0.021341 | 0.02273 |         |
| chr19 | 10352442  | G | C | TYK2     | rs34536443  | 0.014 | 0.0101837 | 0.0015 | 0.0288 | 0.0061 | 0      | 0.0202 | 0.0281 | 0.0093   | 0.0144 | 0.022  | 0.0331 | 0      | 0.0295 | 0.0439   | 0.0181 | 0.0102 | 0.019657 | 0.035354 | 0.02038  | 0.002924 | 0    | 0.017241 | 0.021472 | 0.03409 |         |
| chr11 | 75169325  | G | A | SLC02B1  | rs35199625  | 0.036 | 0.0257588 | 0.0008 | 0.0109 | 0.0409 | 0.0635 | 0.0187 | 0.0118 | 0.0031   | 0      | 0.0158 | 0.0181 | 0.0603 | 0.0206 | 0.0114   | 0.0153 | 0.0381 | 0.01007  | 0.010101 | 0.005435 | 0.005848 | 0    | 0.008621 | 0.015244 | 0.01136 |         |
| chr19 | 10514059  | A | T | S1PR5    | rs35483143  | 0.101 | 0.038139  | 0.0272 | 0.0149 | 0.1074 | 0.0228 | 0.0173 | 0.0259 | 0.0326   | 0.0033 | 0.0163 | 0.037  | 0.0185 | 0.0314 | 0.0197   | 0.0242 | 0.0934 | 0.050101 | 0.046392 | 0.042234 | 0.04386  | 0    | 0.034483 | 0.036585 | 0.10985 |         |
| chr4  | 40354498  | T | G | CHRNA9   | rs371532896 | 0.01  | 0.0007987 | 0      | 0      | 0.0041 | 0      | 0      | 0.0002 | 2.38E-05 | 0      | 0      | 0      | 0      | 0      | 0        | 0      | 0.0082 | 0.001007 | 0        | 0        | 0        | 0    | 0        | 0        | 0.00758 |         |
| chr17 | 27782076  | G | A | NOS2     | rs3730017   | 0.052 | 0.0834665 | 0.2292 | 0.0139 | 0.044  | 0.0069 | 0.0735 | 0.072  | 0.1851   | 0.0133 | 0.06   | 0.0099 | 0.0077 | 0.0055 | 0.0203   | 0.0588 | 0.0504 | 0.030715 | 0.025253 | 0.038043 | 0.055556 | 0    | 0.025862 | 0        | 0.03409 |         |
| chr4  | 9920506   | C | T | SLC2A9   | rs3733591   | 0.404 | 0.294129  | 0.0393 | 0.1909 | 0.4039 | 0.6845 | 0.2075 | 0.1711 | 0.0707   | 0.1456 | 0.1931 | 0.1477 | 0.6527 | 0.243  | 0.1881   | 0.1853 | 0.3825 | 0.178248 | 0.111111 | 0.120924 | 0.137427 | 0.4  | 0.155172 | 0.25     | 0.28788 |         |
| chr15 | 32030599  | G | A | CHRNA7   | rs375844242 | 0.011 | 0.0015974 | 0      | 0      | 0.0082 | 0      | 0      | 0.0002 | 0.0001   | 0      | 0      | 0      | 0      | 0      | 0        | 0      | 0      | 0        | 0        | 0        | 0        | 0    | 0        | 0.008929 | 0       | 0.00769 |
| chr12 | 21293968  | A | G | SLC01A2  | rs377576084 | 0.013 | 0.0025959 | 0      | 0      | 0.0133 | 0      | 0      | 0.0003 | 0        | 0      | 0      | 0      | 0      | 0      | 0        | 0      | 0      | 0        | 0        | 0        | 0        | 0    | 0        | 0        | 0       |         |
| chr5  | 132384290 | C | T | SLC22A5  | rs386134199 | 0.01  | 0.0025959 | 0      | 0      | 0.0133 | 0      | 0      | 0.0002 | 0        | 0      | 0      | 0      | 0      | 0      | 0        | 0      | 0.0085 | .        | .        | .        | .        | .    | .        | .        | .       |         |
| chr22 | 42127634  | C | A | CYP2D6   | rs3915951   | 0.05  | 0         | 0      | 0      | 0      | 0      | 0      | 0.0089 | 0.011    | 0.0206 | 0.0056 | 0.0074 | 0.0178 | 0.0046 | 0.0087   | 0.0077 | 0.0096 | 0.064451 | 0.030303 | 0.066576 | 0.052632 | 0.1  | 0.086207 | 0.073171 | 0.06439 |         |
| chr12 | 21178615  | T | C | SLC01B1  | rs4149056   | 0.051 | 0.0876597 | 0.0136 | 0.161  | 0.0429 | 0.123  | 0.134  | 0.1195 | 0.0325   | 0.0656 | 0.1295 | 0.1743 | 0.1276 | 0.2178 | 0.159    | 0.1227 | 0.0457 | 0.177744 | 0.227273 | 0.209239 | 0.222222 | 0.3  | 0.198276 | 0.112805 | 0.0947  |         |
| chr2  | 23372934  | A | G | UGT1A3   | rs45449995  | 0.012 | 0.0241613 | 0.0522 | 0.0239 | 0.0164 | 0.003  | 0.013  | 0.0345 | 0.0502   | 0.0289 | 0.0199 | 0.0409 | 0.0019 | 0.0221 | 0.0317   | 0.0288 | 0.0181 | 0.021996 | 0.026596 | 0.019074 | 0.040984 | 0    | 0.008621 | 0.022013 | 0.02652 |         |
| chr16 | 16079375  | G | T | ABCC1    | rs45511401  | 0.014 | 0.0153754 | 0.0045 | 0.0457 | 0.0112 | 0      | 0.0202 | 0.0362 | 0.0123   | 0.0522 | 0.0304 | 0.0379 | 0      | 0.051  | 0.0533   | 0.0349 | 0.0125 | 0.032762 | 0.045455 | 0.029891 | 0.017544 | 0.1  | 0.060345 | 0.027607 | 0.03788 |         |
| chr2  | 233729259 | C | T | UGT1A3   | rs45625338  | 0.01  | 0.0091853 | 0      | 0      | 0.001  | 0.0446 | 0      | 0.0015 | 0.0002   | 0      | 0.0007 | 0.003  | 0.0313 | 0.0039 | 0.0004   | 0.0033 | 0.0046 | 0.003708 | 0        | 0.004076 | 0        | 0    | 0        | 0.006098 | 0.00763 |         |
| chr15 | 74722964  | C | T | CYP1A1   | rs4646422   | 0.018 | 0.0241613 | 0      | 0      | 0.0051 | 0.1151 | 0      | 0.0034 | 0.0003   | 0      | 0.0007 | 0      | 0.1391 | 0      | 4.65E-05 | 0.0051 | 0.0056 | 0.000504 | 0        | 0        | 0        | 0    | 0        | 0        | 0.00379 |         |
| chr19 | 40843869  | A | G | CYP2A6   | rs5031016   | 0.01  | 0         | 0      | 0      | 0      | 0      | 0      | 0.0044 | 0.0006   | 0.0022 | 0.002  | 0.0133 | 0.1185 | 0.0003 | 0.002    | 0.0098 | 0.0087 | 0.007058 | 0        | 0.00545  | 0.012712 | 0    | 0.008621 | 0.013072 | 0       |         |
| chr19 | 40843845  | C | A | CYP2A6   | rs5031017   | 0.018 | 0         | 0      | 0      | 0      | 0      | 0      | 0.0019 | 0.0007   | 0      | 0.0029 | 0.0009 | 0.0237 | 0.0023 | 0.0014   | 0.0038 | 0.0045 | 0.002162 | 0        | 0.002732 | 0.004167 | 0    | 0        | 0        | 0.00394 |         |
| chr1  | 173909791 | G | T | SERPINC1 | rs549991084 | 0.014 | 0.0015974 | 0      | 0      | 0.0082 | 0      | 0      | 0.0002 | 2.38E-05 | 0      | 0      | 0      | 0      | 0      | 0        | 0      | 0.0075 | 0.000504 | 0        | 0        | 0        | 0    | 0        | 0        | 0       |         |
| chr8  | 42736530  | T | C | CHRN8    | rs55420099  | 0.014 | 0.0023962 | 0      | 0      | 0.0123 | 0      | 0      | 0.0002 | 0        | 0      | 0      | 0      | 0      | 0      | 0        | 0      | 0.0111 | 0.002014 | 0        | 0        | 0        | 0    | 0        | 0.003049 | 0.01136 |         |
| chr10 | 121565644 | G | A | FGFR2    | rs56226109  | 0.015 | 0.0061901 | 0      | 0.004  | 0.0276 | 0      | 0      | 0.0029 | 0.0007   | 0.0033 | 0.0055 | 0.0015 | 0      | 0.0004 | 0.004    | 0.0023 | 0.0132 | 0.006546 | 0        | 0.004076 | 0.008772 | 0    | 0        | 0.006098 | 0.00379 |         |
| chr15 | 74720496  | C | A | CYP1A1   | rs56343424  | 0.02  | 0.0047923 | 0      | 0      | 0.0245 | 0      | 0      | 0.0007 | 0        | 0      | 0      | 0      | 0      | 0      | 0        | 0      | 0      | 0        | 0        | 0        | 0        | 0    | 0.008621 | 0.003049 | 0.00758 |         |
| chr9  | 101670412 | C | A | GRIN3A   | rs565655141 | 0.013 | 0.0015974 | 0      | 0      | 0.0082 | 0      | 0      | 0.0002 | 0        | 0      | 0      | 0      | 0      | 0      | 0        | 0      | 0.0085 | .        | .        | .        | .        | .    | .        | .        | .       |         |
| chr5  | 132331835 | T | A | SLC22A4  | rs567645504 | 0.014 | 0.0023962 | 0      | 0      | 0.0123 | 0      | 0      | 0.0002 | 0        | 0      | 0      | 0      | 0      | 0      | 0        | 0.0009 | 0.0102 | 0.001511 | 0        | 0        | 0        | 0    | 0        | 0        | 0.01136 |         |
| chr12 | 20875274  | G | C | SLC01B3  | rs60140950  | 0.053 | 0.0656949 | 0.0076 | 0.169  | 0.0726 | 0.003  | 0.1081 | 0.1043 | 0.0298   | 0.1844 | 0.1102 | 0.1896 | 0.0013 | 0.1013 | 0.1533   | 0.1176 | 0.0589 | 0.231621 | 0.227273 | 0.241848 | 0.274854 | 0.15 | 0.172414 | 0.22561  | 0.18561 |         |
| chr16 | 72023522  | C | T | DHODH    | rs61733129  | 0.022 | 0.0233626 | 0.003  | 0.0258 | 0.0245 | 0.0446 | 0.0259 | 0.022  | 0.0062   | 0      | 0.0189 | 0.0226 | 0.0527 | 0.0242 | 0.0315   | 0.0218 | 0.0214 | 0.02568  | 0        | 0.017663 | 0.052632 | 0    | 0.025862 | 0.04878  | 0.03409 |         |

|       |           |   |   |         |            |       |           |        |        |        |        |        |        |          |        |        |        |        |        |        |        |        |          |          |          |          |      |          |          |         |
|-------|-----------|---|---|---------|------------|-------|-----------|--------|--------|--------|--------|--------|--------|----------|--------|--------|--------|--------|--------|--------|--------|--------|----------|----------|----------|----------|------|----------|----------|---------|
| chr5  | 143400772 | C | T | NR3C1   | rs6190     | 0.021 | 0.0105831 | 0      | 0.0298 | 0.0184 | 0.001  | 0.0058 | 0.0167 | 0.0049   | 0.0011 | 0.0064 | 0.0178 | 0      | 0.0203 | 0.0275 | 0.0093 | 0.0105 | 0.012588 | 0.005051 | 0.01087  | 0.011696 | 0    | 0.008621 | 0.015244 | 0.01894 |
| chr9  | 101573304 | T | A | GRIN3A  | rs62000403 | 0.086 | 0.0501198 | 0.003  | 0.0586 | 0.092  | 0.0754 | 0.0317 | 0.044  | 0.012    | 0.07   | 0.0347 | 0.0404 | 0.0744 | 0.0501 | 0.0622 | 0.04   | 0.0853 | 0.017623 | 0.005051 | 0.005435 | 0.005848 | 0    | 0.017241 | 0.021341 | 0.06818 |
| chr7  | 99859982  | C | G | CYP3A43 | rs680055   | 0.03  | 0.124601  | 0.3782 | 0.0557 | 0.0307 | 0.002  | 0.0519 | 0.131  | 0.3092   | 0.0467 | 0.074  | 0.0539 | 0.0003 | 0.0556 | 0.0554 | 0.1178 | 0.0478 | 0.112348 | 0.176768 | 0.133515 | 0.121302 | 0.1  | 0.155172 | 0.088957 | 0.04962 |
| chr15 | 78593232  | T | A | CHRNA5  | rs76071148 | 0.03  | 0.0547125 | 0      | 0      | 0.0112 | 0.2599 | 0.0014 | 0.0062 | 0.0006   | 0.0022 | 0.0009 | 0      | 0.2422 | 0      | 0.0004 | 0.0121 | 0.0144 | 0.003021 | 0        | 0        | 0        | 0    | 0.008621 | 0.009146 | 0.00758 |
| chr9  | 133636447 | G | A | DBH     | rs76856960 | 0.013 | 0.0033946 | 0      | 0.004  | 0.0112 | 0      | 0.0029 | 0.0037 | 0.0007   | 0      | 0.001  | 0      | 0      | 0.0078 | 0.0056 | 0.0023 | 0.0131 | 0.013595 | 0.005051 | 0.005435 | 0.01462  | 0    | 0.043103 | 0.018293 | 0.01515 |
| chr22 | 42128185  | C | T | CYP2D6  | rs77913725 | 0.02  | 0.0039936 | 0      | 0      | 0.0204 | 0      | 0      | 0.0004 | 9.72E-05 | 0      | 0      | 0      | 0      | 0      | 0      | 0.0009 | 0.0151 | .        | .        | .        | .        | .    | .        | .        |         |
| chr15 | 78618888  | C | T | CHRNA3  | rs8192475  | 0.01  | 0.014976  | 0.0076 | 0.0408 | 0.0123 | 0      | 0.0173 | 0.0307 | 0.0116   | 0.0089 | 0.0215 | 0.0172 | 0.0003 | 0.0264 | 0.0488 | 0.0334 | 0.0164 | 0.024673 | 0.030303 | 0.023098 | 0.017544 | 0.05 | 0.034483 | 0.018293 | 0.03788 |
