# Supplementary material
Source: PubMed Central journal article supplement (PMC8216321)
Supplement: Supplementary_Table_4A.pdf [file Supplementary_Table_4A.pdf]

**Supplementary Table 4a: Degrees of the network node (drug or gene) based on gene-drug associations of COVID-19 drugs**

| Name           | Type | Degree |
|----------------|------|--------|
| ABCB1          | Gene | 25     |
| ABCC1          | Gene | 4      |
| ABCC2          | Gene | 4      |
| ABCC4          | Gene | 2      |
| ABCG2          | Gene | 7      |
| ACE2           | Gene | 2      |
| AGTR1          | Gene | 2      |
| ALB            | Gene | 18     |
| ALDH2          | Gene | 2      |
| ANXA1          | Gene | 2      |
| Acalabrutinib  | Drug | 3      |
| Acetylcysteine | Drug | 3      |
| Apremilast     | Drug | 4      |
| Azithromycin   | Drug | 3      |
| BCHE           | Gene | 2      |
| Baricitinib    | Drug | 11     |
| Bevacizumab    | Drug | 4      |
| CHRNA2         | Gene | 2      |
| CHRNA3         | Gene | 2      |
| CHRNA7         | Gene | 2      |
| CHRNA4         | Gene | 2      |
| CYP17A1        | Gene | 3      |
| CYP1A1         | Gene | 6      |
| CYP1A2         | Gene | 14     |
| CYP1B1         | Gene | 2      |
| CYP2A6         | Gene | 6      |
| CYP2B6         | Gene | 10     |
| CYP2C19        | Gene | 12     |
| CYP2C8         | Gene | 13     |
| CYP2C9         | Gene | 14     |
| CYP2D6         | Gene | 12     |
| CYP2E1         | Gene | 7      |
| CYP3A4         | Gene | 32     |
| CYP3A5         | Gene | 10     |
| CYP3A7         | Gene | 5      |
| Chlorhexidine  | Drug | 1      |
| Chloroquine    | Drug | 9      |
| Colchicine     | Drug | 6      |
| Dapagliflozin  | Drug | 10     |
| Darunavir      | Drug | 6      |
| Deferoxamine   | Drug | 1      |
| Dexamethasone  | Drug | 19     |
| Disulfiram     | Drug | 4      |

|                                 |      |    |
|---------------------------------|------|----|
| Elbasvir                        | Drug | 4  |
| Enoxaparin                      | Drug | 2  |
| F10                             | Gene | 2  |
| FCGR1A                          | Gene | 2  |
| FCGR2A                          | Gene | 2  |
| FCGR2B                          | Gene | 2  |
| FCGR3A                          | Gene | 2  |
| FGF2                            | Gene | 2  |
| Famotidine                      | Drug | 5  |
| Favipiravir                     | Drug | 7  |
| Fingolimod                      | Drug | 3  |
| Fluoxetine                      | Drug | 15 |
| Fluvoxamine                     | Drug | 10 |
| GRIN3A                          | Gene | 2  |
| Heparin                         | Drug | 3  |
| Human interferon beta           | Drug | 3  |
| Hydroxychloroquine              | Drug | 8  |
| IFNAR1                          | Gene | 2  |
| IL6R                            | Gene | 2  |
| Ibuprofen                       | Drug | 19 |
| Interferon alfa-2b, recombinant | Drug | 2  |
| Isotretinoin                    | Drug | 2  |
| JAK1                            | Gene | 3  |
| JAK2                            | Gene | 3  |
| JAK3                            | Gene | 2  |
| KCNH2                           | Gene | 3  |
| Ketamine                        | Drug | 11 |
| Leflunomide                     | Drug | 4  |
| Lopinavir                       | Drug | 11 |
| Losartan                        | Drug | 11 |
| Metenkefalin                    | Drug | 2  |
| Methylprednisolone              | Drug | 11 |
| NR1I2                           | Gene | 2  |
| NR3C1                           | Gene | 3  |
| Naltrexone                      | Drug | 4  |
| Naproxen                        | Drug | 13 |
| Nicotine                        | Drug | 17 |
| Nitric Oxide                    | Drug | 4  |
| OPRD1                           | Gene | 3  |
| OPRK1                           | Gene | 3  |
| OPRM1                           | Gene | 3  |
| ORM1                            | Gene | 6  |
| PPARG                           | Gene | 2  |
| PTGS1                           | Gene | 3  |
| PTGS2                           | Gene | 2  |

|                 |      |    |
|-----------------|------|----|
| PTK2B           | Gene | 2  |
| Prazosin        | Drug | 6  |
| Progesterone    | Drug | 23 |
| Ramipril        | Drug | 2  |
| Remdesivir      | Drug | 8  |
| Ritonavir       | Drug | 20 |
| Ruxolitinib     | Drug | 3  |
| SERPINC1        | Gene | 2  |
| SLC10A1         | Gene | 2  |
| SLC15A2         | Gene | 2  |
| SLC22A1         | Gene | 3  |
| SLC22A2         | Gene | 4  |
| SLC22A3         | Gene | 3  |
| SLC22A6         | Gene | 7  |
| SLC22A8         | Gene | 6  |
| SLC47A1         | Gene | 2  |
| SLC6A4          | Gene | 2  |
| SLCO1A2         | Gene | 5  |
| SLCO1B1         | Gene | 7  |
| SLCO1B3         | Gene | 5  |
| SLCO2B1         | Gene | 2  |
| Sarilumab       | Drug | 6  |
| Siltuximab      | Drug | 1  |
| Sirolimus       | Drug | 7  |
| TLR9            | Gene | 2  |
| Telmisartan     | Drug | 7  |
| Tocilizumab     | Drug | 2  |
| Tofacitinib     | Drug | 6  |
| Tranexamic Acid | Drug | 1  |
| UGT1A1          | Gene | 2  |
| UGT1A3          | Gene | 4  |
| UGT1A9          | Gene | 4  |
| UGT2B4          | Gene | 2  |
| UGT2B7          | Gene | 5  |
| Umifenovir      | Drug | 8  |
| XDH             | Gene | 2  |
