# Supplementary material
Source: PubMed Central journal article supplement (PMC8216321)
Supplement: Supplementary_Table_4B.pdf [file Supplementary_Table_4B.pdf]

**Supplementary Table 4b: Calculations of Drug score**

| Drug               | Gene  | Category    | GeneDegree | Drugs          | Transporter | Enzyme | Target | Transporter | Enzyme | Target | Score |
|--------------------|-------|-------------|------------|----------------|-------------|--------|--------|-------------|--------|--------|-------|
| Apremilast         | ABCB1 | Transporter | 25         | Acalabrutinib  | 2           | 1      | 0      | 50          | 10     | 0      | 35    |
| Azithromycin       | ABCB1 | Transporter | 25         | Acetylcysteine | 2           | 0      | 1      | 14          | 0      | 2      | 9     |
| Baricitinib        | ABCB1 | Transporter | 25         | Apremilast     | 1           | 3      | 0      | 25          | 52     | 0      | 42    |
| Chloroquine        | ABCB1 | Transporter | 25         | Azithromycin   | 2           | 1      | 0      | 29          | 32     | 0      | 47    |
| Colchicine         | ABCB1 | Transporter | 25         | Baricitinib    | 6           | 1      | 4      | 54          | 32     | 10     | 44    |
| Dapagliflozin      | ABCB1 | Transporter | 25         | Bevacizumab    | 0           | 0      | 4      | 0           | 0      | 8      | 2     |
| Darunavir          | ABCB1 | Transporter | 25         | Chlorhexidine  | 1           | 0      | 0      | 18          | 0      | 0      | 18    |
| Dexamethasone      | ABCB1 | Transporter | 25         | Chloroquine    | 2           | 5      | 2      | 43          | 73     | 4      | 38    |
| Elbasvir           | ABCB1 | Transporter | 25         | Colchicine     | 2           | 4      | 0      | 43          | 62     | 0      | 37    |
| Favipiravir        | ABCB1 | Transporter | 25         | Dapagliflozin  | 1           | 9      | 0      | 25          | 95     | 0      | 36    |
| Fingolimod         | ABCB1 | Transporter | 25         | Darunavir      | 4           | 2      | 0      | 56          | 44     | 0      | 36    |
| Fluoxetine         | ABCB1 | Transporter | 25         | Deferoxamine   | 0           | 1      | 0      | 0           | 2      | 0      | 2     |
| Fluvoxamine        | ABCB1 | Transporter | 25         | Dexamethasone  | 6           | 10     | 3      | 65          | 104    | 7      | 24    |
| Hydroxychloroquine | ABCB1 | Transporter | 25         | Disulfiram     | 0           | 3      | 1      | 0           | 49     | 2      | 18    |
| Ibuprofen          | ABCB1 | Transporter | 25         | Elbasvir       | 1           | 3      | 0      | 25          | 47     | 0      | 41    |
| Lopinavir          | ABCB1 | Transporter | 25         | Enoxaparin     | 0           | 0      | 2      | 0           | 0      | 4      | 2     |
| Losartan           | ABCB1 | Transporter | 25         | Famotidine     | 4           | 1      | 0      | 19          | 14     | 0      | 19    |
| Methylprednisolone | ABCB1 | Transporter | 25         | Favipiravir    | 4           | 3      | 0      | 56          | 22     | 0      | 21    |

|               |       |             |    |
|---------------|-------|-------------|----|
| Naproxen      | ABCB1 | Transporter | 25 |
| Prazosin      | ABCB1 | Transporter | 25 |
| Progesterone  | ABCB1 | Transporter | 25 |
| Remdesivir    | ABCB1 | Transporter | 25 |
| Ritonavir     | ABCB1 | Transporter | 25 |
| Sirolimus     | ABCB1 | Transporter | 25 |
| Telmisartan   | ABCB1 | Transporter | 25 |
| Fingolimod    | ABCC1 | Transporter | 4  |
| Ibuprofen     | ABCC1 | Transporter | 4  |
| Progesterone  | ABCC1 | Transporter | 4  |
| Ritonavir     | ABCC1 | Transporter | 4  |
| Azithromycin  | ABCC2 | Transporter | 4  |
| Dexamethasone | ABCC2 | Transporter | 4  |
| Ritonavir     | ABCC2 | Transporter | 4  |
| Telmisartan   | ABCC2 | Transporter | 4  |
| Ibuprofen     | ABCC4 | Transporter | 2  |
| Remdesivir    | ABCC4 | Transporter | 2  |
| Baricitinib   | ABCG2 | Transporter | 7  |
| Dexamethasone | ABCG2 | Transporter | 7  |

|                                 |   |    |   |    |     |    |    |
|---------------------------------|---|----|---|----|-----|----|----|
| Fingolimod                      | 2 | 1  | 0 | 29 | 7   | 0  | 22 |
| Fluoxetine                      | 3 | 7  | 5 | 49 | 104 | 11 | 33 |
| Fluvoxamine                     | 1 | 7  | 2 | 25 | 100 | 5  | 42 |
| Heparin                         | 0 | 0  | 3 | 0  | 0   | 6  | 2  |
| Human interferon beta           | 1 | 1  | 1 | 18 | 14  | 2  | 34 |
| Hydroxychloroquine              | 3 | 3  | 2 | 48 | 57  | 4  | 37 |
| Ibuprofen                       | 8 | 8  | 3 | 69 | 86  | 7  | 22 |
| Interferon alfa-2b, recombinant | 0 | 1  | 1 | 0  | 14  | 2  | 16 |
| Isotretinoin                    | 1 | 1  | 0 | 18 | 32  | 0  | 50 |
| Ketamine                        | 0 | 5  | 6 | 0  | 72  | 15 | 17 |
| Leflunomide                     | 1 | 2  | 1 | 7  | 28  | 2  | 23 |
| Lopinavir                       | 5 | 6  | 0 | 61 | 94  | 0  | 28 |
| Losartan                        | 3 | 7  | 1 | 50 | 82  | 2  | 30 |
| Metenkefalin                    | 0 | 0  | 2 | 0  | 0   | 6  | 3  |
| Methylprednisolone              | 2 | 7  | 2 | 43 | 89  | 5  | 37 |
| Naltrexone                      | 0 | 1  | 3 | 0  | 2   | 9  | 5  |
| Naproxen                        | 5 | 6  | 2 | 61 | 54  | 5  | 24 |
| Nicotine                        | 3 | 10 | 4 | 10 | 126 | 8  | 18 |
| Nitric Oxide                    | 0 | 4  | 0 | 0  | 58  | 0  | 15 |

|                       |       |             |    |
|-----------------------|-------|-------------|----|
| Leflunomide           | ABCG2 | Transporter | 7  |
| Prazosin              | ABCG2 | Transporter | 7  |
| Progesterone          | ABCG2 | Transporter | 7  |
| Ritonavir             | ABCG2 | Transporter | 7  |
| Telmisartan           | ABCG2 | Transporter | 7  |
| Chloroquine           | ACE2  | Target      | 2  |
| Hydroxychloroquine    | ACE2  | Target      | 2  |
| Losartan              | AGTR1 | Target      | 2  |
| Telmisartan           | AGTR1 | Target      | 2  |
| Acalabrutinib         | ALB   | Transporter | 18 |
| Chlorhexidine         | ALB   | Transporter | 18 |
| Chloroquine           | ALB   | Transporter | 18 |
| Colchicine            | ALB   | Transporter | 18 |
| Darunavir             | ALB   | Transporter | 18 |
| Dexamethasone         | ALB   | Transporter | 18 |
| Favipiravir           | ALB   | Transporter | 18 |
| Fluoxetine            | ALB   | Transporter | 18 |
| Human interferon beta | ALB   | Transporter | 18 |
| Hydroxychloroquine    | ALB   | Transporter | 18 |
| Ibuprofen             | ALB   | Transporter | 18 |

|                 |    |    |   |    |     |    |    |
|-----------------|----|----|---|----|-----|----|----|
| Prazosin        | 5  | 0  | 1 | 44 | 0   | 3  | 12 |
| Progesterone    | 9  | 10 | 4 | 60 | 102 | 15 | 21 |
| Ramipril        | 1  | 1  | 0 | 2  | 2   | 0  | 4  |
| Remdesivir      | 5  | 3  | 0 | 41 | 57  | 0  | 27 |
| Ritonavir       | 10 | 9  | 1 | 83 | 122 | 2  | 24 |
| Ruxolitinib     | 0  | 1  | 2 | 0  | 32  | 6  | 35 |
| Sarilumab       | 0  | 1  | 5 | 0  | 32  | 10 | 34 |
| Siltuximab      | 0  | 1  | 0 | 0  | 32  | 0  | 32 |
| Sirolimus       | 3  | 3  | 1 | 34 | 47  | 2  | 29 |
| Telmisartan     | 3  | 2  | 2 | 36 | 16  | 4  | 22 |
| Tocilizumab     | 0  | 1  | 1 | 0  | 32  | 2  | 34 |
| Tofacitinib     | 1  | 2  | 3 | 18 | 44  | 8  | 43 |
| Tranexamic Acid | 1  | 0  | 0 | 2  | 0   | 0  | 2  |
| Umifenovir      | 0  | 8  | 0 | 0  | 98  | 0  | 12 |

|                    |         |             |    |
|--------------------|---------|-------------|----|
| Isotretinoin       | ALB     | Transporter | 18 |
| Lopinavir          | ALB     | Transporter | 18 |
| Losartan           | ALB     | Transporter | 18 |
| Methylprednisolone | ALB     | Transporter | 18 |
| Naproxen           | ALB     | Transporter | 18 |
| Ritonavir          | ALB     | Transporter | 18 |
| Tofacitinib        | ALB     | Transporter | 18 |
| Disulfiram         | ALDH2   | Target      | 2  |
| Nitric Oxide       | ALDH2   | Enzyme      | 2  |
| Dexamethasone      | ANXA1   | Target      | 2  |
| Methylprednisolone | ANXA1   | Target      | 2  |
| Ketamine           | BCHE    | Target      | 2  |
| Ramipril           | BCHE    | Enzyme      | 2  |
| Fluoxetine         | CHRNA2  | Target      | 2  |
| Nicotine           | CHRNA2  | Target      | 2  |
| Fluoxetine         | CHRNA3  | Target      | 2  |
| Nicotine           | CHRNA3  | Target      | 2  |
| Ketamine           | CHRNA7  | Target      | 2  |
| Nicotine           | CHRNA7  | Target      | 2  |
| Fluoxetine         | CHRN4   | Target      | 2  |
| Nicotine           | CHRN4   | Target      | 2  |
| Dexamethasone      | CYP17A1 | Enzyme      | 3  |
| Progesterone       | CYP17A1 | Enzyme      | 3  |
| Progesterone       | CYP17A1 | Target      | 3  |
| Chloroquine        | CYP1A1  | Enzyme      | 6  |
| Dapagliflozin      | CYP1A1  | Enzyme      | 6  |
| Dexamethasone      | CYP1A1  | Enzyme      | 6  |
| Fluvoxamine        | CYP1A1  | Enzyme      | 6  |
| Nicotine           | CYP1A1  | Enzyme      | 6  |
| Progesterone       | CYP1A1  | Enzyme      | 6  |

|                                 |         |        |    |
|---------------------------------|---------|--------|----|
| Apremilast                      | CYP1A2  | Enzyme | 14 |
| Dapagliflozin                   | CYP1A2  | Enzyme | 14 |
| Famotidine                      | CYP1A2  | Enzyme | 14 |
| Fluoxetine                      | CYP1A2  | Enzyme | 14 |
| Fluvoxamine                     | CYP1A2  | Enzyme | 14 |
| Human interferon beta           | CYP1A2  | Enzyme | 14 |
| Interferon alfa-2b, recombinant | CYP1A2  | Enzyme | 14 |
| Leflunomide                     | CYP1A2  | Enzyme | 14 |
| Lopinavir                       | CYP1A2  | Enzyme | 14 |
| Naproxen                        | CYP1A2  | Enzyme | 14 |
| Nicotine                        | CYP1A2  | Enzyme | 14 |
| Nitric Oxide                    | CYP1A2  | Enzyme | 14 |
| Ritonavir                       | CYP1A2  | Enzyme | 14 |
| Umifenovir                      | CYP1A2  | Enzyme | 14 |
| Methylprednisolone              | CYP1B1  | Enzyme | 2  |
| Progesterone                    | CYP1B1  | Enzyme | 2  |
| Apremilast                      | CYP2A6  | Enzyme | 6  |
| Dapagliflozin                   | CYP2A6  | Enzyme | 6  |
| Dexamethasone                   | CYP2A6  | Enzyme | 6  |
| Methylprednisolone              | CYP2A6  | Enzyme | 6  |
| Nicotine                        | CYP2A6  | Enzyme | 6  |
| Progesterone                    | CYP2A6  | Enzyme | 6  |
| Colchicine                      | CYP2B6  | Enzyme | 10 |
| Dexamethasone                   | CYP2B6  | Enzyme | 10 |
| Fluoxetine                      | CYP2B6  | Enzyme | 10 |
| Fluvoxamine                     | CYP2B6  | Enzyme | 10 |
| Ketamine                        | CYP2B6  | Enzyme | 10 |
| Lopinavir                       | CYP2B6  | Enzyme | 10 |
| Methylprednisolone              | CYP2B6  | Enzyme | 10 |
| Nicotine                        | CYP2B6  | Enzyme | 10 |
| Nitric Oxide                    | CYP2B6  | Enzyme | 10 |
| Ritonavir                       | CYP2B6  | Enzyme | 10 |
| Dexamethasone                   | CYP2C19 | Enzyme | 12 |

|                    |         |        |    |
|--------------------|---------|--------|----|
| Fluoxetine         | CYP2C19 | Enzyme | 12 |
| Fluvoxamine        | CYP2C19 | Enzyme | 12 |
| Ibuprofen          | CYP2C19 | Enzyme | 12 |
| Lopinavir          | CYP2C19 | Enzyme | 12 |
| Losartan           | CYP2C19 | Enzyme | 12 |
| Methylprednisolone | CYP2C19 | Enzyme | 12 |
| Nicotine           | CYP2C19 | Enzyme | 12 |
| Progesterone       | CYP2C19 | Enzyme | 12 |
| Ritonavir          | CYP2C19 | Enzyme | 12 |
| Telmisartan        | CYP2C19 | Enzyme | 12 |
| Tofacitinib        | CYP2C19 | Enzyme | 12 |
| Chloroquine        | CYP2C8  | Enzyme | 13 |
| Colchicine         | CYP2C8  | Enzyme | 13 |
| Dexamethasone      | CYP2C8  | Enzyme | 13 |
| Favipiravir        | CYP2C8  | Enzyme | 13 |
| Hydroxychloroquine | CYP2C8  | Enzyme | 13 |
| Ibuprofen          | CYP2C8  | Enzyme | 13 |
| Ketamine           | CYP2C8  | Enzyme | 13 |
| Losartan           | CYP2C8  | Enzyme | 13 |
| Methylprednisolone | CYP2C8  | Enzyme | 13 |
| Naproxen           | CYP2C8  | Enzyme | 13 |
| Nicotine           | CYP2C8  | Enzyme | 13 |
| Remdesivir         | CYP2C8  | Enzyme | 13 |
| Ritonavir          | CYP2C8  | Enzyme | 13 |
| Dapagliflozin      | CYP2C9  | Enzyme | 14 |
| Fluoxetine         | CYP2C9  | Enzyme | 14 |
| Fluvoxamine        | CYP2C9  | Enzyme | 14 |
| Ibuprofen          | CYP2C9  | Enzyme | 14 |
| Ketamine           | CYP2C9  | Enzyme | 14 |
| Leflunomide        | CYP2C9  | Enzyme | 14 |
| Lopinavir          | CYP2C9  | Enzyme | 14 |
| Losartan           | CYP2C9  | Enzyme | 14 |
| Methylprednisolone | CYP2C9  | Enzyme | 14 |
| Naproxen           | CYP2C9  | Enzyme | 14 |

|                    |        |             |    |
|--------------------|--------|-------------|----|
| Nicotine           | CYP2C9 | Enzyme      | 14 |
| Progesterone       | CYP2C9 | Enzyme      | 14 |
| Ritonavir          | CYP2C9 | Enzyme      | 14 |
| Umifenovir         | CYP2C9 | Enzyme      | 14 |
| Chloroquine        | CYP2D6 | Enzyme      | 12 |
| Dapagliflozin      | CYP2D6 | Enzyme      | 12 |
| Darunavir          | CYP2D6 | Enzyme      | 12 |
| Fluoxetine         | CYP2D6 | Enzyme      | 12 |
| Fluvoxamine        | CYP2D6 | Enzyme      | 12 |
| Hydroxychloroquine | CYP2D6 | Enzyme      | 12 |
| Lopinavir          | CYP2D6 | Enzyme      | 12 |
| Nicotine           | CYP2D6 | Enzyme      | 12 |
| Progesterone       | CYP2D6 | Enzyme      | 12 |
| Remdesivir         | CYP2D6 | Enzyme      | 12 |
| Ritonavir          | CYP2D6 | Enzyme      | 12 |
| Umifenovir         | CYP2D6 | Enzyme      | 12 |
| Colchicine         | CYP2E1 | Enzyme      | 7  |
| Dexamethasone      | CYP2E1 | Enzyme      | 7  |
| Disulfiram         | CYP2E1 | Enzyme      | 7  |
| Favipiravir        | CYP2E1 | Enzyme      | 7  |
| Fingolimod         | CYP2E1 | Enzyme      | 7  |
| Nicotine           | CYP2E1 | Enzyme      | 7  |
| Umifenovir         | CYP2E1 | Enzyme      | 7  |
| Acalabrutinib      | CYP3A4 | Transporter | 32 |
| Apremilast         | CYP3A4 | Enzyme      | 32 |
| Azithromycin       | CYP3A4 | Enzyme      | 32 |
| Baricitinib        | CYP3A4 | Enzyme      | 32 |
| Chloroquine        | CYP3A4 | Enzyme      | 32 |
| Colchicine         | CYP3A4 | Enzyme      | 32 |
| Dapagliflozin      | CYP3A4 | Enzyme      | 32 |
| Darunavir          | CYP3A4 | Enzyme      | 32 |
| Dexamethasone      | CYP3A4 | Enzyme      | 32 |
| Disulfiram         | CYP3A4 | Enzyme      | 32 |
| Elbasvir           | CYP3A4 | Enzyme      | 32 |
| Fluoxetine         | CYP3A4 | Enzyme      | 32 |
| Fluvoxamine        | CYP3A4 | Enzyme      | 32 |

|                    |        |        |    |
|--------------------|--------|--------|----|
| Hydroxychloroquine | CYP3A4 | Enzyme | 32 |
| Ibuprofen          | CYP3A4 | Enzyme | 32 |
| Isotretinoin       | CYP3A4 | Enzyme | 32 |
| Ketamine           | CYP3A4 | Enzyme | 32 |
| Lopinavir          | CYP3A4 | Enzyme | 32 |
| Losartan           | CYP3A4 | Enzyme | 32 |
| Methylprednisolone | CYP3A4 | Enzyme | 32 |
| Nicotine           | CYP3A4 | Enzyme | 32 |
| Nitric Oxide       | CYP3A4 | Enzyme | 32 |
| Progesterone       | CYP3A4 | Enzyme | 32 |
| Remdesivir         | CYP3A4 | Enzyme | 32 |
| Ritonavir          | CYP3A4 | Enzyme | 32 |
| Ruxolitinib        | CYP3A4 | Enzyme | 32 |
| Sarilumab          | CYP3A4 | Enzyme | 32 |
| Siltuximab         | CYP3A4 | Enzyme | 32 |
| Sirolimus          | CYP3A4 | Enzyme | 32 |
| Tocilizumab        | CYP3A4 | Enzyme | 32 |
| Tofacitinib        | CYP3A4 | Enzyme | 32 |
| Umifenovir         | CYP3A4 | Enzyme | 32 |
| Acalabrutinib      | CYP3A5 | Enzyme | 10 |
| Chloroquine        | CYP3A5 | Enzyme | 10 |
| Dexamethasone      | CYP3A5 | Enzyme | 10 |
| Disulfiram         | CYP3A5 | Enzyme | 10 |
| Elbasvir           | CYP3A5 | Enzyme | 10 |
| Fluoxetine         | CYP3A5 | Enzyme | 10 |
| Progesterone       | CYP3A5 | Enzyme | 10 |
| Ritonavir          | CYP3A5 | Enzyme | 10 |
| Sirolimus          | CYP3A5 | Enzyme | 10 |
| Umifenovir         | CYP3A5 | Enzyme | 10 |
| Dexamethasone      | CYP3A7 | Enzyme | 5  |
| Elbasvir           | CYP3A7 | Enzyme | 5  |
| Progesterone       | CYP3A7 | Enzyme | 5  |
| Ritonavir          | CYP3A7 | Enzyme | 5  |
| Sirolimus          | CYP3A7 | Enzyme | 5  |
| Enoxaparin         | F10    | Target | 2  |
| Heparin            | F10    | Target | 2  |



|                                 |        |        |   |
|---------------------------------|--------|--------|---|
| Bevacizumab                     | FCGR1A | Target | 2 |
| Sarilumab                       | FCGR1A | Target | 2 |
| Bevacizumab                     | FCGR2A | Target | 2 |
| Sarilumab                       | FCGR2A | Target | 2 |
| Bevacizumab                     | FCGR2B | Target | 2 |
| Sarilumab                       | FCGR2B | Target | 2 |
| Bevacizumab                     | FCGR3A | Target | 2 |
| Sarilumab                       | FCGR3A | Target | 2 |
| Heparin                         | FGF2   | Target | 2 |
| Sirolimus                       | FGF2   | Target | 2 |
| Acetylcysteine                  | GRIN3A | Target | 2 |
| Ketamine                        | GRIN3A | Target | 2 |
| Human interferon beta           | IFNAR1 | Target | 2 |
| Interferon alfa-2b, recombinant | IFNAR1 | Target | 2 |
| Sarilumab                       | IL6R   | Target | 2 |
| Tocilizumab                     | IL6R   | Target | 2 |
| Baricitinib                     | JAK1   | Target | 3 |
| Ruxolitinib                     | JAK1   | Target | 3 |
| Tofacitinib                     | JAK1   | Target | 3 |
| Baricitinib                     | JAK2   | Target | 3 |
| Ruxolitinib                     | JAK2   | Target | 3 |
| Tofacitinib                     | JAK2   | Target | 3 |
| Baricitinib                     | JAK3   | Target | 2 |
| Tofacitinib                     | JAK3   | Target | 2 |
| Fluoxetine                      | KCNH2  | Target | 3 |
| Fluvoxamine                     | KCNH2  | Target | 3 |
| Prazosin                        | KCNH2  | Target | 3 |
| Dexamethasone                   | NR1I2  | Target | 2 |
| Ritonavir                       | NR1I2  | Target | 2 |
| Dexamethasone                   | NR3C1  | Target | 3 |
| Methylprednisolone              | NR3C1  | Target | 3 |
| Progesterone                    | NR3C1  | Target | 3 |
| Ketamine                        | OPRD1  | Target | 3 |
| Metenkefalin                    | OPRD1  | Target | 3 |
| Naltrexone                      | OPRD1  | Target | 3 |

|                 |              |             |   |
|-----------------|--------------|-------------|---|
| Ketamine        | OPRK1        | Target      | 3 |
| Naltrexone      | OPRK1        | Target      | 3 |
| Progesterone    | OPRK1        | Target      | 3 |
| Ketamine        | OPRM1        | Target      | 3 |
| Metenkefalin    | OPRM1        | Target      | 3 |
| Naltrexone      | OPRM1        | Target      | 3 |
| Darunavir       | ORM1         | Transporter | 6 |
| Fluoxetine      | ORM1         | Transporter | 6 |
| Lopinavir       | ORM1         | Transporter | 6 |
| Prazosin        | ORM1         | Transporter | 6 |
| Progesterone    | ORM1         | Target      | 6 |
| Ritonavir       | ORM1         | Transporter | 6 |
| Ibuprofen       | PPARG        | Target      | 2 |
| Telmisartan     | PPARG        | Target      | 2 |
| Ibuprofen       | PTGS1        | Target      | 3 |
| Ketamine        | PTGS1        | Enzyme      | 3 |
| Naproxen        | PTGS1        | Target      | 3 |
| Ibuprofen       | PTGS2        | Target      | 2 |
| Naproxen        | PTGS2        | Target      | 2 |
| Baricitinib     | PTK2B        | Target      | 2 |
| Leflunomide     | PTK2B        | Target      | 2 |
| Enoxaparin      | SERPINC<br>1 | Target      | 2 |
| Heparin         | SERPINC<br>1 | Target      | 2 |
| Progesterone    | SLC10A1      | Transporter | 2 |
| Remdesivir      | SLC10A1      | Transporter | 2 |
| Ramipril        | SLC15A2      | Transporter | 2 |
| Tranexamic Acid | SLC15A2      | Transporter | 2 |

|                |         |             |   |
|----------------|---------|-------------|---|
| Nicotine       | SLC22A1 | Transporter | 3 |
| Prazosin       | SLC22A1 | Transporter | 3 |
| Progesterone   | SLC22A1 | Transporter | 3 |
| Baricitinib    | SLC22A2 | Transporter | 4 |
| Famotidine     | SLC22A2 | Transporter | 4 |
| Nicotine       | SLC22A2 | Transporter | 4 |
| Progesterone   | SLC22A2 | Transporter | 4 |
| Nicotine       | SLC22A3 | Transporter | 3 |
| Prazosin       | SLC22A3 | Transporter | 3 |
| Progesterone   | SLC22A3 | Transporter | 3 |
| Acetylcysteine | SLC22A6 | Transporter | 7 |
| Baricitinib    | SLC22A6 | Transporter | 7 |
| Famotidine     | SLC22A6 | Transporter | 7 |
| Favipiravir    | SLC22A6 | Transporter | 7 |
| Ibuprofen      | SLC22A6 | Transporter | 7 |
| Losartan       | SLC22A6 | Transporter | 7 |
| Naproxen       | SLC22A6 | Transporter | 7 |
| Baricitinib    | SLC22A8 | Transporter | 6 |
| Dexamethasone  | SLC22A8 | Transporter | 6 |

|                    |         |             |   |
|--------------------|---------|-------------|---|
| Famotidine         | SLC22A8 | Transporter | 6 |
| Favipiravir        | SLC22A8 | Transporter | 6 |
| Ibuprofen          | SLC22A8 | Transporter | 6 |
| Naproxen           | SLC22A8 | Transporter | 6 |
| Famotidine         | SLC47A1 | Transporter | 2 |
| Sirolimus          | SLC47A1 | Transporter | 2 |
| Fluoxetine         | SLC6A4  | Target      | 2 |
| Fluvoxamine        | SLC6A4  | Target      | 2 |
| Dexamethasone      | SLCO1A2 | Transporter | 5 |
| Hydroxychloroquine | SLCO1A2 | Transporter | 5 |
| Ibuprofen          | SLCO1A2 | Transporter | 5 |
| Naproxen           | SLCO1A2 | Transporter | 5 |
| Ritonavir          | SLCO1A2 | Transporter | 5 |
| Acetylcysteine     | SLCO1B1 | Transporter | 7 |
| Darunavir          | SLCO1B1 | Transporter | 7 |
| Lopinavir          | SLCO1B1 | Transporter | 7 |
| Progesterone       | SLCO1B1 | Transporter | 7 |
| Remdesivir         | SLCO1B1 | Transporter | 7 |
| Ritonavir          | SLCO1B1 | Transporter | 7 |
| Sirolimus          | SLCO1B1 | Transporter | 7 |

|                    |         |             |   |
|--------------------|---------|-------------|---|
| Baricitinib        | SLCO1B3 | Transporter | 5 |
| Lopinavir          | SLCO1B3 | Transporter | 5 |
| Progesterone       | SLCO1B3 | Transporter | 5 |
| Remdesivir         | SLCO1B3 | Transporter | 5 |
| Ritonavir          | SLCO1B3 | Transporter | 5 |
| Ibuprofen          | SLCO2B1 | Transporter | 2 |
| Ritonavir          | SLCO2B1 | Transporter | 2 |
| Chloroquine        | TLR9    | Target      | 2 |
| Hydroxychloroquine | TLR9    | Target      | 2 |
| Losartan           | UGT1A1  | Enzyme      | 2 |
| Naltrexone         | UGT1A1  | Enzyme      | 2 |
| Ibuprofen          | UGT1A3  | Enzyme      | 4 |
| Losartan           | UGT1A3  | Enzyme      | 4 |
| Naproxen           | UGT1A3  | Enzyme      | 4 |
| Telmisartan        | UGT1A3  | Enzyme      | 4 |
| Dapagliflozin      | UGT1A9  | Enzyme      | 4 |
| Ibuprofen          | UGT1A9  | Enzyme      | 4 |
| Naproxen           | UGT1A9  | Enzyme      | 4 |
| Umifenovir         | UGT1A9  | Enzyme      | 4 |
| Dapagliflozin      | UGT2B4  | Enzyme      | 2 |
| Ibuprofen          | UGT2B4  | Enzyme      | 2 |
| Dapagliflozin      | UGT2B7  | Enzyme      | 5 |
| Ibuprofen          | UGT2B7  | Enzyme      | 5 |
| Losartan           | UGT2B7  | Enzyme      | 5 |
| Naproxen           | UGT2B7  | Enzyme      | 5 |
| Umifenovir         | UGT2B7  | Enzyme      | 5 |
| Deferoxamine       | XDH     | Enzyme      | 2 |
| Favipiravir        | XDH     | Enzyme      | 2 |
