# Supplementary material
Source: PubMed Central journal article supplement (PMC8216321)
Supplement: Supplementary_Table_4C.pdf [file Supplementary_Table_4C.pdf]

| Supplementary Table 4c: Normalized scores of the gene / drug node |      |             |            |                     |                 |
|-------------------------------------------------------------------|------|-------------|------------|---------------------|-----------------|
| Name                                                              | Type | Gene_Degree | Drug_Score | NodeScore (C and D) | NormalizedScore |
| Isotretinoin                                                      | Drug |             | 50         | 50                  | 1               |
| Azithromycin                                                      | Drug |             | 46.5       | 47                  | 0.93            |
| Baricitinib                                                       | Drug |             | 43.5       | 44                  | 0.87            |
| Tofacitinib                                                       | Drug |             | 42.7       | 43                  | 0.85            |
| Apremilast                                                        | Drug |             | 42.3       | 42                  | 0.85            |
| Fluvoxamine                                                       | Drug |             | 41.8       | 42                  | 0.84            |
| Elbasvir                                                          | Drug |             | 40.7       | 41                  | 0.81            |
| Chloroquine                                                       | Drug |             | 38.1       | 38                  | 0.76            |
| Hydroxychloroquine                                                | Drug |             | 37         | 37                  | 0.74            |
| Colchicine                                                        | Drug |             | 37         | 37                  | 0.74            |
| Methylprednisolone                                                | Drug |             | 36.7       | 37                  | 0.73            |
| Darunavir                                                         | Drug |             | 36         | 36                  | 0.72            |
| Dapagliflozin                                                     | Drug |             | 35.6       | 36                  | 0.71            |
| Acalabrutinib                                                     | Drug |             | 35         | 35                  | 0.7             |
| Ruxolitinib                                                       | Drug |             | 35         | 35                  | 0.7             |
| Sarilumab                                                         | Drug |             | 34         | 34                  | 0.68            |
| Tocilizumab                                                       | Drug |             | 34         | 34                  | 0.68            |
| Human interferon beta                                             | Drug |             | 34         | 34                  | 0.68            |
| Fluoxetine                                                        | Drug |             | 33.4       | 33                  | 0.67            |
| Siltuximab                                                        | Drug |             | 32         | 32                  | 0.64            |
| Losartan                                                          | Drug |             | 30.4       | 30                  | 0.61            |
| Sirolimus                                                         | Drug |             | 29         | 29                  | 0.58            |
| Lopinavir                                                         | Drug |             | 27.9       | 28                  | 0.56            |
| Remdesivir                                                        | Drug |             | 27.2       | 27                  | 0.54            |
| Ritonavir                                                         | Drug |             | 23.9       | 24                  | 0.48            |
| Naproxen                                                          | Drug |             | 23.7       | 24                  | 0.47            |
| Dexamethasone                                                     | Drug |             | 23.6       | 24                  | 0.47            |
| Leflunomide                                                       | Drug |             | 23         | 23                  | 0.46            |
| Telmisartan                                                       | Drug |             | 22         | 22                  | 0.44            |
| Ibuprofen                                                         | Drug |             | 21.7       | 22                  | 0.43            |
| Fingolimod                                                        | Drug |             | 21.5       | 22                  | 0.43            |
| Favipiravir                                                       | Drug |             | 21.3       | 21                  | 0.43            |
| Progesterone                                                      | Drug |             | 20.6       | 21                  | 0.41            |
| Famotidine                                                        | Drug |             | 18.8       | 19                  | 0.38            |
| Disulfiram                                                        | Drug |             | 18.3       | 18                  | 0.37            |
| Chlorhexidine                                                     | Drug |             | 18         | 18                  | 0.36            |
| Nicotine                                                          | Drug |             | 17.9       | 18                  | 0.36            |
| Ketamine                                                          | Drug |             | 16.9       | 17                  | 0.34            |
| Interferon alfa-2b, recombinant                                   | Drug |             | 16         | 16                  | 0.32            |
| Nitric Oxide                                                      | Drug |             | 14.5       | 14.5                | 0.29            |

|                 |      |    |      |    |      |
|-----------------|------|----|------|----|------|
| Umifenovir      | Drug |    | 12.3 | 12 | 0.25 |
| Prazosin        | Drug |    | 11.8 | 12 | 0.24 |
| Acetylcysteine  | Drug |    | 9    | 9  | 0.18 |
| Naltrexone      | Drug |    | 5    | 5  | 0.1  |
| Ramipril        | Drug |    | 4    | 4  | 0.08 |
| Metenkefalin    | Drug |    | 3    | 3  | 0.06 |
| Bevacizumab     | Drug |    | 2    | 2  | 0.04 |
| Heparin         | Drug |    | 2    | 2  | 0.04 |
| Enoxaparin      | Drug |    | 2    | 2  | 0.04 |
| Deferoxamine    | Drug |    | 2    | 2  | 0.04 |
| Tranexamic Acid | Drug |    | 2    | 2  | 0.04 |
| CYP3A4          | Gene | 32 |      | 32 | 1    |
| ABCB1           | Gene | 25 |      | 25 | 0.78 |
| ALB             | Gene | 18 |      | 18 | 0.56 |
| CYP1A2          | Gene | 14 |      | 14 | 0.44 |
| CYP2C9          | Gene | 14 |      | 14 | 0.44 |
| CYP2C8          | Gene | 13 |      | 13 | 0.41 |
| CYP2C19         | Gene | 12 |      | 12 | 0.38 |
| CYP2D6          | Gene | 12 |      | 12 | 0.38 |
| CYP2B6          | Gene | 10 |      | 10 | 0.31 |
| CYP3A5          | Gene | 10 |      | 10 | 0.31 |
| ABCG2           | Gene | 7  |      | 7  | 0.22 |
| CYP2E1          | Gene | 7  |      | 7  | 0.22 |
| SLC22A6         | Gene | 7  |      | 7  | 0.22 |
| SLCO1B1         | Gene | 7  |      | 7  | 0.22 |
| CYP1A1          | Gene | 6  |      | 6  | 0.19 |
| CYP2A6          | Gene | 6  |      | 6  | 0.19 |
| ORM1            | Gene | 6  |      | 6  | 0.19 |
| SLC22A8         | Gene | 6  |      | 6  | 0.19 |
| CYP3A7          | Gene | 5  |      | 5  | 0.16 |
| SLCO1A2         | Gene | 5  |      | 5  | 0.16 |
| SLCO1B3         | Gene | 5  |      | 5  | 0.16 |
| UGT2B7          | Gene | 5  |      | 5  | 0.16 |
| ABCC1           | Gene | 4  |      | 4  | 0.13 |
| ABCC2           | Gene | 4  |      | 4  | 0.13 |
| SLC22A2         | Gene | 4  |      | 4  | 0.13 |
| UGT1A3          | Gene | 4  |      | 4  | 0.13 |
| UGT1A9          | Gene | 4  |      | 4  | 0.13 |
| CYP17A1         | Gene | 3  |      | 3  | 0.09 |
| JAK1            | Gene | 3  |      | 3  | 0.09 |
| JAK2            | Gene | 3  |      | 3  | 0.09 |
| KCNH2           | Gene | 3  |      | 3  | 0.09 |
| NR3C1           | Gene | 3  |      | 3  | 0.09 |
| OPRD1           | Gene | 3  |      | 3  | 0.09 |

|          |      |   |   |      |
|----------|------|---|---|------|
| OPRK1    | Gene | 3 | 3 | 0.09 |
| OPRM1    | Gene | 3 | 3 | 0.09 |
| PTGS1    | Gene | 3 | 3 | 0.09 |
| SLC22A1  | Gene | 3 | 3 | 0.09 |
| SLC22A3  | Gene | 3 | 3 | 0.09 |
| ABCC4    | Gene | 2 | 2 | 0.06 |
| ACE2     | Gene | 2 | 2 | 0.06 |
| AGTR1    | Gene | 2 | 2 | 0.06 |
| ALDH2    | Gene | 2 | 2 | 0.06 |
| ANXA1    | Gene | 2 | 2 | 0.06 |
| BCHE     | Gene | 2 | 2 | 0.06 |
| CHRNA2   | Gene | 2 | 2 | 0.06 |
| CHRNA3   | Gene | 2 | 2 | 0.06 |
| CHRNA7   | Gene | 2 | 2 | 0.06 |
| CHRNA4   | Gene | 2 | 2 | 0.06 |
| CYP1B1   | Gene | 2 | 2 | 0.06 |
| F10      | Gene | 2 | 2 | 0.06 |
| FCGR1A   | Gene | 2 | 2 | 0.06 |
| FCGR2A   | Gene | 2 | 2 | 0.06 |
| FCGR2B   | Gene | 2 | 2 | 0.06 |
| FCGR3A   | Gene | 2 | 2 | 0.06 |
| FGF2     | Gene | 2 | 2 | 0.06 |
| GRIN3A   | Gene | 2 | 2 | 0.06 |
| IFNAR1   | Gene | 2 | 2 | 0.06 |
| IL6R     | Gene | 2 | 2 | 0.06 |
| JAK3     | Gene | 2 | 2 | 0.06 |
| NR1I2    | Gene | 2 | 2 | 0.06 |
| PPARG    | Gene | 2 | 2 | 0.06 |
| PTGS2    | Gene | 2 | 2 | 0.06 |
| PTK2B    | Gene | 2 | 2 | 0.06 |
| SERPINC1 | Gene | 2 | 2 | 0.06 |
| SLC10A1  | Gene | 2 | 2 | 0.06 |
| SLC15A2  | Gene | 2 | 2 | 0.06 |
| SLC47A1  | Gene | 2 | 2 | 0.06 |
| SLC6A4   | Gene | 2 | 2 | 0.06 |
| SLCO2B1  | Gene | 2 | 2 | 0.06 |
| TLR9     | Gene | 2 | 2 | 0.06 |
| UGT1A1   | Gene | 2 | 2 | 0.06 |
| UGT2B4   | Gene | 2 | 2 | 0.06 |
| XDH      | Gene | 2 | 2 | 0.06 |
