# Supplementary material
Source: PubMed Central journal article supplement (PMC8216321)
Supplement: Supplementary_Table_5.pdf [file Supplementary_Table_5.pdf]

| <b>Supplementary Table 5: Drugs used for treating metabolic disorders and their associated genes</b> |                    |                                                                                          |                                                                                        |                 |                                                                                                                       |
|------------------------------------------------------------------------------------------------------|--------------------|------------------------------------------------------------------------------------------|----------------------------------------------------------------------------------------|-----------------|-----------------------------------------------------------------------------------------------------------------------|
|                                                                                                      | <b>DrugBank ID</b> | <b>Targets</b>                                                                           | <b>Enzymes</b>                                                                         | <b>Carriers</b> | <b>Transporter</b>                                                                                                    |
| <b>Anti-Diabetics</b>                                                                                |                    |                                                                                          |                                                                                        |                 |                                                                                                                       |
| Acarbose                                                                                             | DB00284            | MGAM,<br>AMY2A, GAA,<br>SI                                                               |                                                                                        |                 |                                                                                                                       |
| Canagliflozin                                                                                        | DB08907            | SLC5A2                                                                                   | UGT1A9,<br>UGT2B4, CYP3A4                                                              | ORM1            | ABCB1                                                                                                                 |
| Dapagliflozin                                                                                        | DB06292            | SLC5A2                                                                                   | CYP2D6<br>CYP1A2<br>CYP3A4<br>CYP2C9<br>CYP2A6<br>UGT1A9<br>CYP1A1<br>UGT2B7<br>UGT2B4 |                 | ABCB1                                                                                                                 |
| Dulaglutide                                                                                          | DB09045            | GLP1R                                                                                    |                                                                                        |                 |                                                                                                                       |
| Empagliflozin                                                                                        | DB09038            | SLC5A2                                                                                   |                                                                                        |                 |                                                                                                                       |
| Exenatide                                                                                            | DB01276            | GLP1R                                                                                    | DPP4                                                                                   | ALB             |                                                                                                                       |
| Glibenclamide                                                                                        | DB01016            | ABCA1<br>CPT1A<br>ABCC9<br>ABCB11<br>CFTR<br>KCNJ11<br>KCNJ8<br>ABCC8<br>KCNJ11<br>TRPM4 | CYP3A5<br>CYP3A4<br>CYP2C9<br>CYP2C19<br>CYP3A7                                        | ALB             | ABCB11<br>ABCC1<br>SLC15A1<br>ABCB1<br>SLCO2B1<br>ABCC3<br>SLC22A6<br>ABCG2<br>ABCC2<br>SLC15A2<br>SLCO1A2<br>SLC22A7 |
| Gliclazide                                                                                           | DB01120            | VEGFA<br>ABCC8                                                                           | CYP2C9<br>CYP2C19                                                                      | ALB             |                                                                                                                       |
| Glimepiride                                                                                          | DB00222            | ABCC8<br>KCNJ1<br>KCNJ11                                                                 | CYP2C9                                                                                 |                 | ABCB11                                                                                                                |
| Glipizide                                                                                            | DB01067            | ABCC8<br>PPARG                                                                           | CYP2C9<br>UGT1A1                                                                       | ALB             | ABCB11                                                                                                                |
| Insulin                                                                                              | DB14472            |                                                                                          |                                                                                        |                 |                                                                                                                       |
| Linagliptin                                                                                          | DB08882            | DPP4                                                                                     | CYP3A4                                                                                 |                 | ABCB1<br>SLC22A2<br>SLC22A1<br>SLC22A3                                                                                |
| Liraglutide                                                                                          | DB06655            | GLP1R                                                                                    | MME<br>DPP4                                                                            | ALB             |                                                                                                                       |
| Metformin                                                                                            | DB00331            | GPD1<br>PRKAB1<br>ETFDH                                                                  |                                                                                        |                 | SLC22A2<br>SLC22A1<br>SLC22A3<br>SLC47A1<br>SLC47A2<br>SLC29A4                                                        |

|                                                               |         |                                                          |                                                                     |                     |                                                     |
|---------------------------------------------------------------|---------|----------------------------------------------------------|---------------------------------------------------------------------|---------------------|-----------------------------------------------------|
| Nateglinide                                                   | DB00731 | ABCC8<br>PPARG                                           | PTGS1<br>CYP3A5<br>CYP2D6<br>CYP3A4<br>CYP2C9<br>UGT1A9<br>CYP3A7   | ALB<br>ORM1         | SLC16A1<br>SLC15A1<br>SLC22A6<br>SLC15A2<br>ABCC4   |
| Pioglitazone                                                  | DB01132 | PPARA<br>PPARG<br>PPARD<br>MAOB                          | PTGS1<br>CYP3A4<br>CYP2C9<br>CYP2C8                                 |                     | SLCO1B1<br>SLCO1B3                                  |
| Repaglinide                                                   | DB00912 | ABCC8<br>PPARG                                           | CYP3A4<br>CYP2C8                                                    | ALB                 | ABCB11<br>SLCO1B1                                   |
| Rosiglitazone                                                 | DB00412 | PPARA<br>RXRB<br>PPARG<br>RXRA<br>RXRG<br>ACSL4<br>PPARD | PTGS1<br>CYP2D6<br>CYP1A2<br>CYP3A4<br>CYP2C9<br>CYP2C8<br>CYP2A6   | ALB                 | ABCB11<br>SLCO1B1                                   |
| Saxagliptin                                                   | DB06335 | DPP4                                                     | CYP3A5<br>CYP3A4                                                    |                     | ABCC1<br>SLC22A8<br>SLCO4C1                         |
| Sitagliptin                                                   | DB01261 | DPP4                                                     | CYP3A4<br>CYP2C8                                                    |                     | ABCB1<br>SLC22A8                                    |
| Tolbutamide                                                   | DB01124 | ABCC8<br>KCNJ1                                           | CYP2C9<br>CYP2C8<br>CYP2C19<br>CYP2C18                              | ALB                 | SLC15A1<br>SLCO2B1<br>SLC22A6<br>SLC15A2<br>SLCO1A2 |
| Vildagliptin                                                  | DB04876 | DPP4                                                     |                                                                     |                     |                                                     |
|                                                               |         |                                                          |                                                                     |                     |                                                     |
| <b>Anti-Coagulant,<br/>Anti-platelet and<br/>Fibrinolytic</b> |         |                                                          |                                                                     |                     |                                                     |
| Acenocoumarol                                                 | DB01418 | VKORC1                                                   | CYP1A2<br>CYP3A4<br>CYP2C9<br>CYP2C19                               | ALB<br>ORM1         | ABCB1                                               |
| Apixaban                                                      | DB06605 | F10                                                      | CYP3A5<br>CYP1A2<br>CYP3A4<br>CYP2C9<br>CYP2C8<br>CYP2C19<br>CYP2J2 |                     | ABCB1<br>ABCG2                                      |
| Argatroban                                                    | DB00278 | F2                                                       | CYP3A5<br>CYP3A4                                                    | ALB<br>ORM1<br>ORM2 |                                                     |

|              |         |                                                                                                                                                                                                                                                                    |                                                                             |  |                                                                    |
|--------------|---------|--------------------------------------------------------------------------------------------------------------------------------------------------------------------------------------------------------------------------------------------------------------------|-----------------------------------------------------------------------------|--|--------------------------------------------------------------------|
| Aspirin      | DB00945 | PTGS1<br>AKR1C1<br>PTGS2<br>CASP1<br>EDNRA<br>CCND1<br>HSPA5<br>IKBKB<br>CASP3<br>TP53<br>NFKBIA<br>MYC<br>RPS6KA3<br>PRKAA1<br>PRKAA2<br>PRKAB1<br>PRKAB2<br>PRKAG1<br>PRKAG2<br>PRKAG3<br>TNFAIP6<br>PCNA<br>MAPK1<br>MAPK15<br>MAPK3<br>MAPK4<br>MAPK6<br>MAPK7 | CYP2C9<br>CYP2C19<br>NAT2<br>UGT1A6                                         |  | ABCB1<br>SLC22A6<br>SLC22A8                                        |
| Betrixaban   | DB12364 | F10                                                                                                                                                                                                                                                                | F2                                                                          |  | KCNH2<br>ABCB1                                                     |
| Clopidogrel  | DB00758 | P2RY12                                                                                                                                                                                                                                                             | CYP3A5<br>CYP1A2<br>CYP3A4<br>CES1<br>CYP2C9<br>CYP2C8<br>CYP2C19<br>CYP2B6 |  | ABCB1<br>SLC22A2<br>SLC22A1                                        |
| Dabigatran   | DB14726 |                                                                                                                                                                                                                                                                    |                                                                             |  |                                                                    |
| Dalteparin   | DB06779 | VEGFA<br>SERPINC1<br>TFPI<br>SELP                                                                                                                                                                                                                                  | HPSE                                                                        |  |                                                                    |
| Dipyridamole | DB00975 | PDE5A<br>PDE10A<br>ORM1<br>PDE4A<br>ADA<br>RCAN1                                                                                                                                                                                                                   |                                                                             |  | ABCB11<br>SLCO1B1<br>ABCB1<br>SLCO2B1<br>ABCC4<br>ABCC5<br>SLCO1B3 |
| Edoxaban     | DB09075 | F10                                                                                                                                                                                                                                                                |                                                                             |  | ABCB1                                                              |

|                              |         |                                                                                                   |                                                            |                |                  |
|------------------------------|---------|---------------------------------------------------------------------------------------------------|------------------------------------------------------------|----------------|------------------|
| Eltrombopag                  | DB06210 | MPL                                                                                               | CYP1A2<br>CYP2C8<br>UGT1A9<br>UGT1A1<br>UGT1A3             |                | SLCO1B1<br>ABCG2 |
| Enoxaparin                   | DB01225 | F10<br>SERPINC1                                                                                   | MPO                                                        |                |                  |
| Fondaparinux                 | DB00569 | F10<br>SERPINC1                                                                                   |                                                            |                |                  |
| Heparin                      | DB01109 | F10<br>SERPINC1<br>FGF4<br>FGF1<br>FGFR2<br>FGF2<br>HGF<br>PF4<br>SELP<br>FGFR4<br>FGFR1<br>FGF19 | HPSE                                                       | SERPINA7       |                  |
| Phenprocoumon                | DB00946 | VKORC1                                                                                            | CYP3A4<br>CYP2C9<br>CYP2C8                                 | ALB<br>ORM1    |                  |
| Prasugrel                    | DB06209 | P2RY12                                                                                            | CYP3A4<br>CYP2C9<br>CYP2C19<br>CYP2B6<br>CES2              | ALB            |                  |
| Rivaroxaban                  | DB06228 | F10                                                                                               | CYP3A5<br>CYP3A4<br>CYP2J2                                 | ABCB1<br>ABCG2 |                  |
| Streptokinase                | DB00086 | PLG<br>F2R                                                                                        | PLA2G4A                                                    |                |                  |
| Ticagrelor                   | DB08816 | P2RY12                                                                                            | CYP2D6<br>CYP3A4<br>CYP2C9                                 |                | ABCB1            |
| Tinzaparin                   | DB06822 | SERPINC1<br>ITGA4<br>CXCL12                                                                       | ADAMTS4                                                    |                |                  |
| Warfarin                     | DB00682 | VKORC1<br>NR1I2                                                                                   | CYP1A2<br>CYP3A4<br>CYP2C9<br>CYP2C8<br>CYP2C19<br>CYP2C18 | ALB<br>ORM1    |                  |
|                              |         |                                                                                                   |                                                            |                |                  |
| <b>Lipid Lowering Agents</b> |         |                                                                                                   |                                                            |                |                  |

|              |         |                                                          |                                                                                                         |          |                                                                                                 |
|--------------|---------|----------------------------------------------------------|---------------------------------------------------------------------------------------------------------|----------|-------------------------------------------------------------------------------------------------|
| Atorvastatin | DB01076 | HMGCR<br>DPP4<br>HDAC2<br>AHR<br>NR1I3                   | CYP3A5<br>CYP2D6<br>CYP3A4<br>CYP2C9<br>CYP2C8<br>CYP2C19<br>UGT1A1<br>CYP2B6<br>CYP3A7<br>UGT1A3       | ALB      | ABCB11<br>ABCC1<br>SLCO1B1<br>ABCB1<br>SLCO2B1<br>ABCC2<br>ABCC4<br>ABCC5<br>SLCO1A2<br>SLCO1B3 |
| Bezafibrate  | DB01393 | PPARA<br>RXRB<br>PPARG<br>RXRA<br>RXRG<br>NR1I2<br>PPARD | CYP3A4<br>CYP2C8<br>CYP1A1                                                                              |          | SLCO1B1                                                                                         |
| Clofibrate   | DB00636 | PPARA                                                    | CYP4A11<br>GSTA2<br>CYP3A4<br>CYP2E1<br>CYP1A1                                                          | SERPINA7 |                                                                                                 |
| Evolocumab   | DB09303 |                                                          | PCSK9                                                                                                   |          |                                                                                                 |
| Ezetimibe    | DB00973 | SOAT1<br>NPC1L1<br>ANPEP                                 | CYP3A4<br>CYP2C8<br>UGT1A1<br>UGT1A3<br>UGT2B7<br>UGT2B15                                               |          | ABCB11<br>SLCO1B1<br>ABCB1<br>ABCC3<br>ABCG2<br>ABCC2<br>ABCG5<br>ABCG8                         |
| Fenofibrate  | DB01039 | PPARA<br>NR1I2<br>MMP25                                  | AKR1C1<br>AKR1C3<br>AKR1C2<br>AKR1B1<br>CES1<br>CYP2C9<br>CYP2C8<br>CBR1<br>CYP2A6<br>CYP2C19<br>UGT1A9 | ALB      | ABCB11                                                                                          |

|             |         |                                                                                                                                                                                                                                                                                                    |                                                                                                              |     |                                                   |
|-------------|---------|----------------------------------------------------------------------------------------------------------------------------------------------------------------------------------------------------------------------------------------------------------------------------------------------------|--------------------------------------------------------------------------------------------------------------|-----|---------------------------------------------------|
| Fish oils   | DB13961 | PPARA<br>PPARG<br>PTGS2<br>PPARD<br>FFAR4<br>SCN1A<br>SCN10A<br>SCN11A<br>SCN2A<br>SCN3A<br>SCN4A<br>SCN5A<br>SCN7A<br>SCN8A<br>SCN9A<br>SCN1B<br>SCN2B<br>SCN3B<br>SCN4B<br>NFKB2<br>NFKB1<br>SREBF1<br>DGAT2<br>CACNA1C<br>CACNA1D<br>CACNA1F<br>CACNA1S<br>CACNB1<br>CACNB2<br>CACNB3<br>CACNB4 | CYP3A4                                                                                                       |     |                                                   |
| Fluvastatin | DB01095 | HMGCR<br>HDAC2                                                                                                                                                                                                                                                                                     | CYP3A5<br>CYP2D6<br>CYP3A4<br>CYP2C9<br>CYP2C8<br>CYP2C19<br>UGT1A1<br>CYP1A1<br>CYP2B6<br>UGT1A3<br>UGT2B7  |     | SLCO1B1<br>SLC15A1<br>SLCO2B1<br>ABCC2<br>SLCO1B3 |
| Gemfibrozil | DB01241 | PPARA<br>SLCO1B1<br>SLCO2B1<br>SLC22A8<br>SLCO1B3                                                                                                                                                                                                                                                  | CYP1A2<br>CYP3A4<br>CYP2C9<br>CYP2C8<br>CYP2C19<br>UGT1A9<br>UGT1A1<br>UGT1A3<br>UGT2B7<br>UGT2B17<br>UGT2B4 | ALB |                                                   |

|                      |         |                                        |                                                                   |     |                                                                                                                                       |
|----------------------|---------|----------------------------------------|-------------------------------------------------------------------|-----|---------------------------------------------------------------------------------------------------------------------------------------|
| Lovastatin           | DB00227 | ITGAL<br>HMGCR<br>HDAC2                | CYP3A4<br>CYP2C8<br>CYP2C19<br>UGT1A1<br>PON3<br>UGT1A3<br>UGT2B7 | ALB | ABCB11<br>SLCO1B1<br>ABCB1<br>SLCO2B1<br>ABCC2<br>SLCO1A2<br>SLCO1B3                                                                  |
| Pravastatin          | DB00175 | HMGCR                                  |                                                                   |     | SLC16A1<br>ABCB11<br>SLC22A11<br>SLCO1B1<br>ABCB1<br>SLCO2B1<br>SLC22A6<br>ABCG2<br>ABCC2<br>SLCO1A2<br>SLC22A8<br>SLC22A7<br>SLCO1B3 |
| Rosuvastatin         | DB01098 | ITGAL<br>HMGCR                         | CYP2C9                                                            | ALB | SLC7A11<br>ABCB11<br>SLCO1B1<br>SLCO2B1<br>ABCG2<br>ABCC2<br>ABCC4<br>SLCO1A2<br>SLC10A1<br>SLC22A8<br>SLCO1B3                        |
| Simvastatin          | DB00641 | ITGAL<br>HMGCR<br>HDAC2                |                                                                   |     |                                                                                                                                       |
| <b>Hypertensives</b> |         |                                        |                                                                   |     |                                                                                                                                       |
| Benazepril           | DB00542 | ACE                                    | MTHFR                                                             |     | SLC15A1<br>SLC15A2                                                                                                                    |
| Captopril            | DB01197 | MMP9<br>ACE<br>MMP2<br>LTA4H<br>BDKRB1 |                                                                   | ALB | SLC15A1<br>ABCB1<br>SLC22A6                                                                                                           |
| Cilazapril           | DB01340 | ACE                                    |                                                                   |     | SLC15A1<br>ABCB1<br>SLC15A2                                                                                                           |
| Enalapril            | DB00584 | ACE                                    |                                                                   | ALB | SLC15A1<br>ABCB1<br>SLC22A6<br>SLCO1A2<br>SLC22A8<br>SLC22A7                                                                          |
| Fosinopril           | DB00492 | ACE                                    |                                                                   |     | SLC15A1<br>SLC15A2                                                                                                                    |

|              |         |                                                                                  |                                                                                           |                     |                                                  |
|--------------|---------|----------------------------------------------------------------------------------|-------------------------------------------------------------------------------------------|---------------------|--------------------------------------------------|
| Lisinopril   | DB00722 | ACE<br>REN                                                                       |                                                                                           |                     | SLC15A1<br>SLC15A2                               |
| Perindopril  | DB00790 | ACE<br>SFRP4                                                                     | BCHE                                                                                      |                     | SLC15A1<br>SLC15A2                               |
| Quinapril    | DB00881 | ACE                                                                              | CES1                                                                                      | ALB                 | SLC15A1<br>SLC15A2<br>SLC22A8                    |
| Ramipril     | DB00178 | ACE                                                                              | BCHE                                                                                      |                     | SLC15A1<br>SLC15A2                               |
| Trandolapril | DB00519 | ACE                                                                              | CES1                                                                                      |                     | SLC15A1<br>SLC15A2                               |
| Candesartan  | DB13919 | AGTR1                                                                            | PTGS1<br>CYP2C9<br>CYP2C8<br>UGT1A3                                                       |                     | SLCO1B1<br>ABCB1                                 |
| Eprosartan   | DB00876 | AGTR1                                                                            |                                                                                           |                     | ABCC2                                            |
| Irbesartan   | DB01029 | AGTR1<br>JUN                                                                     | PTGS1<br>CYP3A4<br>CYP2C9<br>CYP2C8<br>UGT1A3                                             | ALB<br>ORM1<br>ORM2 |                                                  |
| Losartan     | DB00678 | AGTR1                                                                            | CYP3A4<br>CYP2C9<br>CYP2C8<br>CYP2C19<br>UGT1A1<br>UGT1A3<br>UGT1A10<br>UGT2B7<br>UGT2B17 | ALB                 | ABCB11<br>ABCB1<br>SLC22A6<br>SLC22A12<br>SLC2A9 |
| Olmesartan   | DB00275 | AGTR1                                                                            |                                                                                           | ALB                 | ABCB11<br>SLCO1B1<br>ABCC2<br>SLCO1B3            |
| Telmisartan  | DB00966 | AGTR1<br>PPARG                                                                   | CYP2C19<br>UGT1A3                                                                         |                     | ABCB11<br>ABCB1<br>ABCG2<br>ABCC2                |
| Valsartan    | DB00177 | AGTR1                                                                            | CYP2C9                                                                                    |                     | SLCO1B1<br>ABCC2<br>SLCO1B3                      |
| Amiloride    | DB00594 | SCNN1B<br>SCNN1A<br>AOC1<br>ASIC1<br>SCNN1D<br>SCNN1G<br>ASIC2<br>SLC9A1<br>PLAU | AOC1                                                                                      |                     | SLC22A4<br>SLC22A2                               |



|                     |         |                                                                                                                                                 |                                                |                 |                                                                      |
|---------------------|---------|-------------------------------------------------------------------------------------------------------------------------------------------------|------------------------------------------------|-----------------|----------------------------------------------------------------------|
| Bendroflumethiazide | DB00436 | CA1<br>CA2<br>SLC12A3<br>CA4<br>KCNMA1                                                                                                          | TPMT                                           |                 |                                                                      |
| Chlortalidone       | DB00310 | CA1<br>SLC12A1                                                                                                                                  |                                                | ALB             |                                                                      |
| Furosemide          | DB00695 | SLC12A1                                                                                                                                         | UGT1A1<br>PGD                                  | ALB<br>SERPINA7 | SLC22A5<br>SLC22A11<br>SLC22A6<br>ABCC2<br>SLC22A8<br>SLCO2A1        |
| Hydrochlorothiazide | DB00999 | SLC12A3                                                                                                                                         |                                                | ALB             | SLC22A11<br>SLC22A6<br>ABCC4<br>SLC22A8                              |
| Indapamide          | DB00808 | SLC12A3                                                                                                                                         | CYP3A4                                         |                 |                                                                      |
| Metolazone          | DB00524 | SLC12A3                                                                                                                                         |                                                |                 |                                                                      |
| Torasemide          | DB00214 | SLC12A2<br>SLC12A1                                                                                                                              | CYP2C9<br>CYP2C8                               | ALB             | SLC01B1                                                              |
| Xipamide            | DB13803 | SLC12A2<br>SLC12A1                                                                                                                              | CYP2C9<br>CYP2C8                               | ALB             | SLC01B1                                                              |
| Aliskiren           | DB09026 | REN                                                                                                                                             | CYP3A4                                         |                 |                                                                      |
| Clonidine           | DB00575 | ADRA2A<br>ADRA2C<br>ADRA1A<br>ADRA2B<br>ADRA1B<br>ADRA1D                                                                                        | CYP3A5<br>CYP2D6<br>CYP1A2<br>CYP3A4<br>CYP1A1 | ALB             | SLC22A5<br>SLC22A4<br>ABCB1<br>SLC22A3                               |
| Digoxin             | DB00390 | ATP1A1                                                                                                                                          | CYP11A1                                        |                 | ABCB11<br>SLC01B1<br>ABCB1<br>SLC01A2<br>SLCO4C1<br>SLC51A<br>SLC51B |
| Dopamine            | DB00988 | DRD1<br>SLC18A2<br>DBH<br>DRD5<br>HTR1A<br>HTR3A<br>DRD4<br>SLC6A2<br>DRD3<br>SLC6A3<br>HTR7<br>SLC6A4<br>DRD2<br>SOD1<br>DRD1<br>DRD5<br>HTR3B | DBH<br>COMT<br>MAOB<br>MAOA                    |                 | SLC22A5<br>SLC22A2<br>SLC22A1<br>SLC22A3<br>POU5F1                   |

|                      |         |                                                                                             |                                                 |                     |                                      |
|----------------------|---------|---------------------------------------------------------------------------------------------|-------------------------------------------------|---------------------|--------------------------------------|
| Doxazosin            | DB00590 | ADRA1A<br>ADRA1B<br>ADRA1D<br>KCNH2<br>KCNH6<br>KCNH7                                       | CYP2D6<br>CYP3A4<br>CYP2C9<br>CYP2C19           |                     | ABCB1<br>SLC22A1                     |
| Eplerenone           | DB00700 | NR3C2                                                                                       | CYP3A5<br>CYP3A4<br>CYP11B2                     |                     |                                      |
| Hydralazine          | DB01275 | P4HA1<br>AOC3<br>HIF1A                                                                      | CYP3A4                                          | ALB                 |                                      |
| Isosorbide dinitrate | DB00883 | NPR1                                                                                        | CYP2E1                                          |                     |                                      |
| Ivabradine           | DB09083 | HCN2                                                                                        | CYP3A4                                          |                     |                                      |
| Labetalol            | DB00598 | ADRB1<br>ADRB2<br>ADRA1A<br>ADRA1B<br>ADRA1D                                                | CYP2D6<br>CYP2C19<br>UGT1A9<br>UGT1A1<br>UGT2B7 | ALB<br>ORM1<br>ORM2 | ABCB5                                |
| Lacidipine           | DB09236 | CACNA1C<br>CACNA1D<br>CACNA1F<br>CACNA1S<br>CACNB1<br>CACNB2<br>CACNB3<br>CACNB4<br>CACNA1A | CYP3A4                                          | ALB<br>ORM1         |                                      |
| Lercanidipine        | DB00528 | CACNG1                                                                                      | CYP3A5<br>CYP2D6<br>CYP3A4<br>CYP3A7            |                     |                                      |
| Methyldopa           | DB00968 | ADRA2A<br>DDC                                                                               | COMT                                            |                     | SLC15A1                              |
| Moxonidine           | DB09242 | ADRA2A<br>NISCH                                                                             |                                                 |                     |                                      |
| Prazosin             | DB00457 | KCNH2<br>ADRA2A<br>ADRA1A<br>ADRA2B<br>ADRA1B<br>ADRA1D<br>ADRA1A<br>ADRA1B<br>ADRA1D       |                                                 | ORM1                | ABCB1<br>ABCG2<br>SLC22A1<br>SLC22A3 |

|                         |         |                                                                                                                                                                                                                                                                                               |                  |             |                    |
|-------------------------|---------|-----------------------------------------------------------------------------------------------------------------------------------------------------------------------------------------------------------------------------------------------------------------------------------------------|------------------|-------------|--------------------|
| Ranolazine              | DB00243 | ADRB1<br>ADRA1A<br>ADRA1B<br>ADRA1D<br>SCN1A<br>SCN10A<br>SCN11A<br>SCN2A<br>SCN3A<br>SCN4A<br>SCN5A<br>SCN7A<br>SCN8A<br>SCN9A<br>SCN1B<br>SCN2B<br>SCN3B<br>SCN4B<br>KCNJ12<br>KCNJ14<br>KCNJ2<br>KCNJ4<br>CACNA1C<br>CACNA1D<br>CACNA1F<br>CACNA1S<br>CACNB1<br>CACNB2<br>CACNB3<br>CACNB4 | CYP2D6<br>CYP3A4 | ALB<br>ORM1 | ABCB11<br>ABCB1    |
| Sacubitril              | DB09292 | MME                                                                                                                                                                                                                                                                                           |                  |             | SLCO1B1<br>SLCO1B3 |
| Sodium<br>nitroprusside | DB00325 | NPR1                                                                                                                                                                                                                                                                                          | CYP1A1           |             |                    |

|              |         |                                                                                                                                                                                                                                                                                                                                              |                                                           |                     |                                     |
|--------------|---------|----------------------------------------------------------------------------------------------------------------------------------------------------------------------------------------------------------------------------------------------------------------------------------------------------------------------------------------------|-----------------------------------------------------------|---------------------|-------------------------------------|
| Spirolactone | DB00421 | AR<br>CYP17A1<br>PGR<br>NR3C2<br>SHBG<br>NR3C1<br>NR1I2<br>CYP11B2<br>SRD5A1<br>SRD5A2"<br>"SRD5A3<br>CACNG1<br>CACNG2<br>CACNG3<br>CACNG4<br>CACNG5<br>CACNG6<br>CACNG7<br>CACNG8<br>CACNA2D1<br>CACNA2D2<br>CACNA2D3<br>CACNA2D4<br>CACNA1C<br>CACNA1D<br>CACNA1F<br>CACNA1S<br>CACNB1<br>CACNB2<br>CACNB3<br>CACNB4<br>CACNA1B<br>CACNA1A | CYP11B1<br>CYP2C8                                         | ALB<br>ORM1<br>ORM2 | ABCB11<br>ABCB1<br>ABCC2<br>SLCO1A2 |
| Terazosin    | DB01162 | KCNH2<br>KCNH6<br>ADRA1A<br>ADRA1B<br>KCNH7<br>ADRA1D<br>TGFB1                                                                                                                                                                                                                                                                               |                                                           |                     | ABCB1                               |
| Ambrisenten  | DB06403 | EDNRB<br>EDNRA                                                                                                                                                                                                                                                                                                                               | CYP3A5<br>CYP3A4<br>CYP2C19<br>UGT1A9<br>UGT1A3<br>UGT2B7 |                     | SLCO1B1<br>ABCB1<br>SLCO1B3         |
| Bosentan     | DB00559 | EDNRB<br>EDNRA                                                                                                                                                                                                                                                                                                                               | CYP3A4<br>CYP2C9                                          |                     | ABCB11                              |
| Epoprostenol | DB01240 | P2RY12<br>PTGIS<br>PTGIR                                                                                                                                                                                                                                                                                                                     |                                                           |                     |                                     |

|              |         |                                                                       |                                                                     |             |                                              |
|--------------|---------|-----------------------------------------------------------------------|---------------------------------------------------------------------|-------------|----------------------------------------------|
| Iloprost     | DB01088 | PTGER1<br>PTGIR<br>PDE4B<br>PLAT<br>PDE4A<br>PDE4D<br>PDE4C<br>PTGDR2 |                                                                     |             | SLCO2B1<br>SLCO2A1<br>SLCO3A1                |
| Macitentan   | DB08932 | EDNRB<br>EDNRA                                                        | CYP3A4<br>CYP2C19                                                   | ALB         |                                              |
| Riociguat    | DB08931 | GUCY1A2                                                               | CYP3A4<br>CYP2C8<br>CYP1A1<br>CYP2J2                                | ALB<br>ORM1 | ABCG2                                        |
| Selexipag    | DB11362 | PTGIR                                                                 | CYP3A4<br>CES1<br>CYP2C8                                            |             | SLCO1B1<br>ABCB1<br>SLCO1B3                  |
| Sildenafil   | DB00203 | PDE5A<br>PDE6G<br>PDE6H                                               | CYP3A5<br>CYP2D6<br>CYP3A4<br>CYP2C9<br>CYP2E1<br>CYP2C19<br>CYP3A7 |             | SLCO1B1<br>ABCB1<br>ABCC4<br>ABCC5<br>ABCC10 |
| Tadalafil    | DB00820 | PDE11A                                                                | CYP3A5<br>CYP3A4                                                    |             |                                              |
| Treprostinil | DB00374 | P2RY12<br>PTGIR<br>PPARD                                              | CYP2C9                                                              |             |                                              |
